# Supplementary material for: Tracking global changes induced in the CD4 T-cell receptor repertoire by immunization with a complex antigen using short stretches of CDR3 protein sequence
Source: PubMed Central journal article supplement (PMC4221123; doi:10.1093/bioinformatics/btu523), 2014-08-05
Supplement: supp_btu523_supplementary-information.pdf [file supp_btu523_supplementary-information.pdf]

# Supplementary Information

July 25, 2014

## T Cell Receptor Library Construction

Briefly, C57BL/6 mice were immunised with freeze-dried *Mycobacterium tuberculosis* H37RA in a water/oil emulsion (Complete Freund's Adjuvant). Groups of six mice were sacrificed at day 5, day 14 and day 60, and spleens were harvested and processed for mRNA extraction. Ovalbumin (100 ug/mouse) was included in some immunisations, but the presence or absence of ovalbumin had no effect on the analysis reported below and is not considered further in this study. Six further mice were left unimmunised. Subsequently, mRNA from 2 million purified CD4+ T cells was reverse transcribed, amplified and sequenced as described in detail in Ndifon, W. et al. (2012). Chromatin conformation governs T cell receptor j gene segment usage. Proceedings of the National Academy of Sciences of the United States of America. PMID: 22984176.. Briefly, reverse transcription was carried out using a  $C\beta$ -specific primer linked to an *Illumina* 3' sequencing adapter. The resulting cDNA product was amplified with a multiplex PCR using a set of 23  $V\beta$ -specific primers. Each  $V\beta$ -specific primer was anchored to a restriction site sequence for a restriction enzyme (AclI) that was used to cleave part of the primer sequence, to ensure good coverage of the hypervariable CDR3 with a single short Illumina read. This was followed by ligation of a Illumina 5' adapter, which was linked to a 3-bp barcode sequence at its 3' end, and a second round of PCR amplification using primers for the 5' and 3' Illumina adapters. Final PCR products were gel purified and sequenced using the Genome Analyzer II. The raw sequence files are available from the Short Read Archive (NCBI) under Accession Number SRP042610.

## Modifications to Decombinator: Identification of Constituent V and J Gene Segments in Sequence Reads

Instead of a single keyword identifying each V or J gene as in Decombinator, we used a set of keywords for each gene comprising all subsequences of at least 4 nucleotides in length from the 3' end (post-primer) of a V gene or the 5' end of a J gene. A keyword trie was then built for each V and J gene, and each sequence read was searched, using the Aho-Corasick algorithm for instances of keywords from any of these tries.

To identify which V and J genes are contained within a sequence read, the instances of keywords in the read were processed using 4 parameters: match threshold ( $MT$ ), match differential ( $MD$ ), score threshold ( $ST$ ) and score differential ( $SD$ ).

A multi-stage approach was used, with the following steps followed for both V and J gene identification:

1. The longest V (J) keyword match from all the identified keywords is considered. If this keyword is at least  $MT$  nucleotides long and the longest keyword from a different V (J) gene is at least  $MD$  nucleotides shorter, then we assign the V (J) gene to the sequence read that the longest keyword match is from.
2. If step 1 does not identify a V (J) gene, then each V (J) gene is assigned a score reflecting how many keywords from that gene are found in the sequence read. The score for region  $V_i$  ( $J_i$ ) is given as  $\sum_{all\ x} e^{length(x)}$  where  $x$  is any keyword from region  $V_i$  ( $J_i$ ) occurring in the sequence read and  $length(x)$  refers to the number of nucleotides in the matched keyword.

The V (J) gene with the maximum score is considered. If this score is lower than  $ST$ , we conclude that there is not enough similarity between the sequence read and any V (J) gene to be able to identify a gene, and as such the sequence read is discarded.

If the maximum V (J) score is both greater than *ST* and more than *SD* times greater than the next highest score, we assign the V (J) gene with the maximum score to the sequence read.

3. If step 2 does not identify a V (J) gene, but the maximum score is greater than *ST*, we move to a pairwise alignment method, with equal penalties for opening and extending gaps. The sequence read is assigned to the V (J) gene with the highest pairwise alignment score.

After identification of V and J genes within a sequence read the standard Decombinator method for identifying the number of deletions and the inserted nucleotides is used to give the usual set of five-part identifiers (V gene, J gene, V deletions, J deletions, inserted nucleotides) for each of the raw reads, ultimately allowing extraction of the TcR hypervariable CDR3 region, bounded by the most 5' conserved cysteine in the V gene segment and the conserved FG(X)G motif in the J gene segment, where X may be any of the 20 amino acids.

## Source Code

The pipeline consists of two scripts, once Decombinator has been used to extract the CDR3 sequences from the raw sequence reads. The first script is a Python script that takes the CDR3 sequences as input, and outputs a sample set of *n* amino acid triplets represented in terms of their Atchley factor values. These files are then input into the award-winning SVM R package *e1071*.

```
## SCRIPT 1

import os, random
import string
import time
import numpy as np
import math

#####

# Input
q = 10000 ## EDIT - number of feature vectors per histogram
p = 3
howmany = 100 ## EDIT - number of histograms per sample

classtime = "_m2.6" ## EDIT - this is what you want output to be called - see outfile variable

## EDIT - this is the input file of CDR3s to be analysed
filename = "/home/path/to/files/cdr3file.txt"

## EDIT - this is where output file (containing frequency distributions)
pathout = "/home/path/to/files/"
codefile = "codewords"
codewords = np.loadtxt(pathout+codefile+'.txt', delimiter=',')
outfile = open(pathout+'results'+classtime+'.txt', 'w')

def atchley_factor( x ):
    import collections as coll

    m = len(x)
    lookup = [
        [-0.591, -1.302, -0.733, 1.570, -0.146 ],
        [-1.343, 0.465, -0.862, -1.020, -0.255 ],
        [1.050, 0.302, -3.656, -0.259, -3.242 ],
        [1.357, -1.453, 1.477, 0.113, -0.837 ],
        [-1.006, -0.590, 1.891, -0.397, 0.412 ],
        [-0.384, 1.652, 1.330, 1.045, 2.064 ],
        [0.336, -0.417, -1.673, -1.474, -0.078 ],
        [-1.239, -0.547, 2.131, 0.393, 0.816 ],
        [1.831, -0.561, 0.533, -0.277, 1.648 ],
        [-1.019, -0.987, -1.505, 1.266, -0.912 ],
        [-0.663, -1.524, 2.219, -1.005, 1.212 ],
        [0.945, 0.828, 1.299, -0.169, 0.933 ],
        [0.189, 2.081, -1.628, 0.421, -1.392 ],
        [0.931, -0.179, -3.005, -0.503, -1.853 ],
        [1.538, -0.055, 1.502, 0.440, 2.897 ],
        [-0.228, 1.399, -4.760, 0.670, -2.647 ],
        [-0.032, 0.326, 2.213, 0.908, 1.313 ],
        [-1.337, -0.279, -0.544, 1.242, -1.262 ],
        [-0.595, 0.009, 0.672, -2.128, -0.184 ],
        [0.260, 0.830, 3.097, -0.838, 1.512 ] ]

    aa = coll.defaultdict(int)
    aa['A'] = 0; aa['C'] = 1; aa['D'] = 2; aa['E'] = 3
    aa['F'] = 4; aa['G'] = 5; aa['H'] = 6; aa['I'] = 7
    aa['K'] = 8; aa['L'] = 9; aa['M'] = 10; aa['N'] = 11
    aa['P'] = 12; aa['Q'] = 13; aa['R'] = 14; aa['S'] = 15
    aa['T'] = 16; aa['V'] = 17; aa['W'] = 18; aa['Y'] = 19

    xsplit = list(x)
    xfactors = [0] * (5*m)
    for i in range(m):
        for j in range(5):
            xfactors[5*i+j] = lookup[aa[xsplit[i]]][j]

    return xfactors

#####

count = 0
counter = 0
numvects = 0
t0 = time.time()
```

```

histocount = [0]*len(codewords)
print 'Mapping Atchley vectors to codewords...'

seqs = []
for line in open(filename,"r"):
    line = line.rstrip("\n")
    seqs.append(line)

while counter < howmany:

    ## Sample q times to generate freq dist over codewords
    while count < q:
        pickseq = random.randint(0,len(seqs)-1)
        m = len(seqs[pickseq])
        if m > p:
            # start of p-mer must be located p steps from end
            picktriplet = random.randint(0,m-p)

            x = seqs[pickseq][picktriplet:picktriplet+p]
            af = str(atchley_factor(x))[1:-1]
            res = af.split(" ")
            vector = [eval(x) for x in res]
            v = np.array(vector)
            dist = (codewords - v)**2
            dist = np.sum(dist,axis=1)
            dist = np.sqrt(dist)
            ind = np.where(dist == dist.min())[0][0]
            histocount[ind]+=1
            count += 1

        print >> outfile, str(histocount)[1:-1]
        print counter
        histocount = [0]*len(codewords)
        count = 0
        counter += 1

## End sampling

outfile.close()
timed = time.time() - t0
print 'Finished in: ',timed,'seconds'

## SCRIPT 2

path = "/home/path/to/files/"

unt_1 <- read.table(paste(path,"results_unt_1.txt", sep=""), header=FALSE, sep=",")
unt_2 <- read.table(paste(path,"results_unt_2.txt", sep=""), header=FALSE, sep=",")
unt_3 <- read.table(paste(path,"results_unt_3.txt", sep=""), header=FALSE, sep=",")
unt_4 <- read.table(paste(path,"results_unt_4.txt", sep=""), header=FALSE, sep=",")
unt_5 <- read.table(paste(path,"results_unt_5.txt", sep=""), header=FALSE, sep=",")
unt_6 <- read.table(paste(path,"results_unt_6.txt", sep=""), header=FALSE, sep=",")

d5_1 <- read.table(paste(path,"results_d5_1.txt", sep=""), header=FALSE, sep=",")
d5_2 <- read.table(paste(path,"results_d5_2.txt", sep=""), header=FALSE, sep=",")
d5_3 <- read.table(paste(path,"results_d5_3.txt", sep=""), header=FALSE, sep=",")
d5_4 <- read.table(paste(path,"results_d5_4.txt", sep=""), header=FALSE, sep=",")
d5_5 <- read.table(paste(path,"results_d5_5.txt", sep=""), header=FALSE, sep=",")
d5_6 <- read.table(paste(path,"results_d5_6.txt", sep=""), header=FALSE, sep=",")

d14_1 <- read.table(paste(path,"results_d14_1.txt", sep=""), header=FALSE, sep=",")
d14_2 <- read.table(paste(path,"results_d14_2.txt", sep=""), header=FALSE, sep=",")
d14_3 <- read.table(paste(path,"results_d14_3.txt", sep=""), header=FALSE, sep=",")
d14_4 <- read.table(paste(path,"results_d14_4.txt", sep=""), header=FALSE, sep=",")
d14_5 <- read.table(paste(path,"results_d14_5.txt", sep=""), header=FALSE, sep=",")
d14_6 <- read.table(paste(path,"results_d14_6.txt", sep=""), header=FALSE, sep=",")

m2_1 <- read.table(paste(path,"results_m2_1.txt", sep=""), header=FALSE, sep=",")
m2_2 <- read.table(paste(path,"results_m2_2.txt", sep=""), header=FALSE, sep=",")
m2_3 <- read.table(paste(path,"results_m2_3.txt", sep=""), header=FALSE, sep=",")
m2_4 <- read.table(paste(path,"results_m2_4.txt", sep=""), header=FALSE, sep=",")
m2_5 <- read.table(paste(path,"results_m2_5.txt", sep=""), header=FALSE, sep=",")
m2_6 <- read.table(paste(path,"results_m2_6.txt", sep=""), header=FALSE, sep=",")

library("e1071")
numpersample <- 6
kerneln <- "linear"

#####
## TEST ON UNT 1-6 ##
#####

for (i in 1:numpersample){

v <- c(1:numpersample)
v <- v[-i]

## BUILD TEST SET ##

test <- eval(as.name(paste("unt_",i,sep="")))
test <- as.data.frame(test)

## BUILD TRAINING SET ##

training <- c()
for (j in 1:numpersample){
training <- rbind(training,eval(as.name(paste("d5_",j,sep=""))))
training <- as.data.frame(training)
}
numd5 <- dim(training)[1]

for (j in 1:numpersample){
training <- rbind(training,eval(as.name(paste("d14_",j,sep=""))))
training <- as.data.frame(training)
}
numd14 <- dim(training)[1]-numd5

for (j in 1:numpersample){
training <- rbind(training,eval(as.name(paste("m2_",j,sep=""))))
training <- as.data.frame(training)
}

```

```

}
numm2 <- dim(training)[1]-numd5-numd14

for (j in v){
training <- rbind(training,eval(as.name(paste("unt-",j,sep=""))))
training <- as.data.frame(training)
}
numunt <- dim(training)[1]-numd5-numd14-numm2

training <- cbind( c(rep(1,numd5),rep(2,numd14),rep(3,numm2),rep(0,numunt)), training)
colnames(training)[1] <- "class"

## CREATE SVM CLASSIFIER ##

cdr3model <- svm( class ~ ., data = training, type = "C-classification", kernel = kernelfn)

## TEST SVM WITH PREDICT() ##

predictions <- predict(cdr3model, test )
print(table(predictions))

}

#####
## TEST ON DAY5 1-3 ##
#####

for (i in 1:numpersample){

v <- c(1:numpersample)
v <- v[-i]

## BUILD TEST SET ##

test <- eval(as.name(paste("d5-",i,sep="")))
test <- as.data.frame(test)

## BUILD TRAINING SET ##

training <- c()
for (j in 1:numpersample){
training <- rbind(training,eval(as.name(paste("unt-",j,sep=""))))
training <- as.data.frame(training)
}
numunt <- dim(training)[1]

for (j in 1:numpersample){
training <- rbind(training,eval(as.name(paste("d14-",j,sep=""))))
training <- as.data.frame(training)
}
numd14 <- dim(training)[1]-numunt

for (j in 1:numpersample){
training <- rbind(training,eval(as.name(paste("m2-",j,sep=""))))
training <- as.data.frame(training)
}
numm2 <- dim(training)[1]-numunt-numd14

for (j in v){
training <- rbind(training,eval(as.name(paste("d5-",j,sep=""))))
training <- as.data.frame(training)
}
numd5 <- dim(training)[1]-numunt-numd14-numm2

training <- cbind( c(rep(0,numunt),rep(2,numd14),rep(3,numm2),rep(1,numd5)), training)
colnames(training)[1] <- "class"

## CREATE SVM CLASSIFIER ##

cdr3model <- svm( class ~ ., data = training, type = "C-classification", kernel = kernelfn)

## TEST SVM WITH PREDICT() ##

predictions <- predict(cdr3model, test )
print(table(predictions))

}

#####
## TEST ON DAY14 1-3 ##
#####

for (i in 1:numpersample){

v <- c(1:numpersample)
v <- v[-i]

## BUILD TEST SET ##

test <- eval(as.name(paste("d14-",i,sep="")))
test <- as.data.frame(test)

## BUILD TRAINING SET ##

training <- c()
for (j in 1:numpersample){
training <- rbind(training,eval(as.name(paste("unt-",j,sep=""))))
training <- as.data.frame(training)
}
numunt <- dim(training)[1]

for (j in 1:numpersample){
training <- rbind(training,eval(as.name(paste("d5-",j,sep=""))))
training <- as.data.frame(training)
}
numd5 <- dim(training)[1]-numunt

```

```

for (j in 1:numpersample){
training <- rbind(training,eval(as.name(paste("m2-",j,sep=""))))
training <- as.data.frame(training)
}
numm2 <- dim(training)[1]-numunt-numd5

for (j in v){
training <- rbind(training,eval(as.name(paste("d14-",j,sep=""))))
training <- as.data.frame(training)
}
numd14 <- dim(training)[1]-numunt-numd5-numm2

training <- cbind( c(rep(0,numunt),rep(1,numd5),rep(3,numm2),rep(2,numd14)), training)
colnames(training)[1] <- "class"

## CREATE SVM CLASSIFIER ##

cdr3model <- svm( class ~ ., data = training, type = "C-classification", kernel = kernelfn)

## TEST SVM WITH PREDICT() ##

predictions <- predict(cdr3model, test )
print(table(predictions))

}

#####
## TEST ON MONTH2 1-3 ##
#####

for (i in 1:numpersample){
v <- c(1:numpersample)
v <- v[-i]

## BUILD TEST SET ##

test <- eval(as.name(paste("m2-",i,sep="")))
test <- as.data.frame(test)

## BUILD TRAINING SET ##

training <- c()
for (j in 1:3){
training <- rbind(training,eval(as.name(paste("unt-",j,sep=""))))
training <- as.data.frame(training)
}
numunt <- dim(training)[1]

for (j in 1:numpersample){
training <- rbind(training,eval(as.name(paste("d5-",j,sep=""))))
training <- as.data.frame(training)
}
numd5 <- dim(training)[1]-numunt

for (j in 1:numpersample){
training <- rbind(training,eval(as.name(paste("d14-",j,sep=""))))
training <- as.data.frame(training)
}
numd14 <- dim(training)[1]-numunt-numd5

for (j in v){
training <- rbind(training,eval(as.name(paste("m2-",j,sep=""))))
training <- as.data.frame(training)
}
numm2 <- dim(training)[1]-numunt-numd5-numd14

training <- cbind( c(rep(0,numunt),rep(1,numd5),rep(2,numd14),rep(3,numm2)), training)
colnames(training)[1] <- "class"

## CREATE SVM CLASSIFIER ##

cdr3model <- svm( class ~ ., data = training, type = "C-classification", kernel = kernelfn)

## TEST SVM WITH PREDICT() ##

predictions <- predict(cdr3model, test )
print(table(predictions))

}

```

## Supplementary Figures

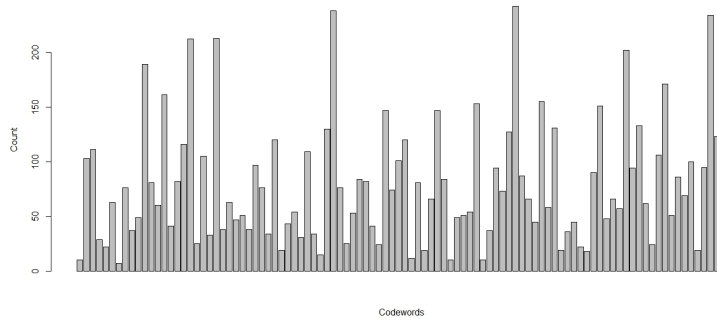

Figure 1: Frequency distribution of the  $20^3 = 8000$  different possible amino acid triplets across the codebook. The number of triplets within each of the 100 codewords is shown.

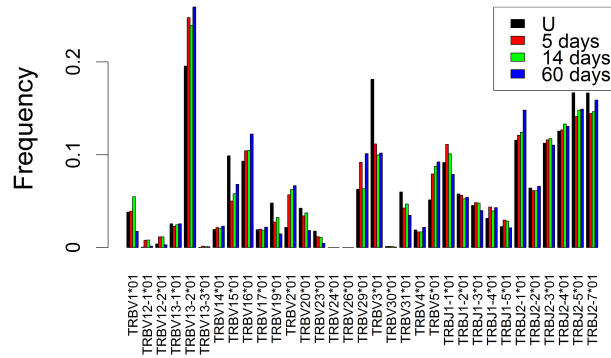

Figure 2: The frequency distribution of mouse V and J region usage within the different groups of mice. The frequencies for all mice in each experimental group were averaged.

## Supplementary Tables

Table 2: Feasible triplets for each of the 100 codewords.

| Codeword | Triplets                                                                                                                                                                                                                                                                                                                                                                                                                                                                                                                                                                  |
|----------|---------------------------------------------------------------------------------------------------------------------------------------------------------------------------------------------------------------------------------------------------------------------------------------------------------------------------------------------------------------------------------------------------------------------------------------------------------------------------------------------------------------------------------------------------------------------------|
| 1        | DSK, DSR, PSK, PSR, QSK, QSR, SDK, SDR, SSK, SSR                                                                                                                                                                                                                                                                                                                                                                                                                                                                                                                          |
| 2        | FEF, FEG, FEI, FEK, FEM, FEN, FER, FET, FEY, GEF, GEG, GEI, GEK, GEM, GEN, GER, GET, GEW, GEY, GFR, GMK, GMR, IEF, IEG, IEI, IEK, IEM, IEN, IER, IET, IEY, KEF, KEG, KEI, KEK, KEM, KEN, KER, KET, KEW, KEY, KFR, KMN, KMR, MEG, MEI, MEK, MEN, MER, MET, MEY, NEF, NEG, NEI, NEK, NEM, NEN, NER, NET, NEY, NFR, NMK, NMN, NMR, REF, REG, REI, REK, REM, REN, RER, RET, REW, REY, RFR, RMR, TEF, TEG, TEI, TEK, TEM, TEN, TER, TET, TEY, TFR, TMR, WEG, WEI, WEK, WEM, WEN, WER, WET, WEY, YEG, YEI, YEK, YEN, YER, YET, YEY, YMR                                         |
| 3        | AFG, AFK, AFN, AFR, AFT, AFY, AIK, AIN, AIR, AIT, AIY, AKF, AKI, AKM, AKT, AMK, AMN, AMR, AMT, AMY, ANF, ANG, ANI, ANK, ANN, ANR, ANT, ANY, ATK, ATN, ATR, ATT, ATY, AYG, AYK, AYN, AYR, AYT, AYY, CFT, CFY, CNK, CNR, CNT, CNY, LFK, LFN, LFR, LFT, LFY, LIK, LIN, LIR, LIT, LIY, LKF, LKI, LMK, LMN, LMR, LMT, LNG, LNI, LNK, LNN, LNR, LNT, LNY, LTK, LTN, LTR, LTT, LTY, LYK, LYN, LYR, LYT, VFG, VFK, VFN, VFR, VFT, VFY, VIK, VIN, VIR, VIT, VIY, VKF, VKI, VMK, VMN, VMR, VMT, VNG, VNI, VNK, VNN, VNR, VNT, VNY, VTK, VTN, VTR, VTT, VTY, VYG, VYK, VYN, VYR, VYT |
| 4        | AGF, AGG, AGI, AGK, AGN, AGR, AGT, AGY, AIG, ATG, LGG, LGI, LGK, LGN, LGR, LGT, LGY, LIG, LTG, LYG, VGG, VGI, VGK, VGN, VGR, VGT, VGY, VIG, VTG                                                                                                                                                                                                                                                                                                                                                                                                                           |
| 5        | DFR, DFT, DIT, DMN, DMR, DMT, DTI, DYG, DYI, DYK, DYN, DYR, DYT, DYY, QYG, QYK, QYN, QYR, QYT, SYI, SYT, SYY                                                                                                                                                                                                                                                                                                                                                                                                                                                              |
| 6        | DAA, DAL, DAV, DCA, DCL, DCV, DHA, DHL, DHV, DLA, DLL, DLV, DPA, DVA, DVL, DVV, PAL, PHA, PHL, PLL, PVL, QAA, QAL, QCA, QCL, QCV, QHA, QLA, QLL, QLV, QPA, QVA, QVL, QVV, SAA, SAC, SAH, SAL, SAV, SCA, SCC, SCL, SCV, SEA, SEL, SEV, SHA, SHC, SHL, SHV, SLA, SLC, SLH, SLL, SLV, SFA, SPL, SPV, SVA, SVC, SVH, SVL, SVV                                                                                                                                                                                                                                                 |
| 7        | AEG, CEG, LEG, LFG, LMG, VEG, VMG                                                                                                                                                                                                                                                                                                                                                                                                                                                                                                                                         |
| 8        | DAH, DAQ, DCC, DCH, DCQ, DEA, DEC, DED, DEH, DEL, DEP, DEQ, DES, DEV, DFH, DFQ, DHC, DHH, DHQ, DIH, DKC, DKH, DKP, DLH, DMH, DMQ, DNH, DVH, DVQ, DWC, DWH, DWL, DWQ, HWH, PEC, PEH, PHH, QAH, QAQ, QCH, QCQ, QEC, QED, QEH, QEL, QEP, QEQ, QES, QEV, QFH, QFQ, QHC, QHH, QHQ, QIH, QKC, QKH, QMH, QMQ, QNH, QVH, QVQ, QWH, QWQ, SCH, SEC, SEH, SEP, SEQ, SFH, SHH, SIH, SKH, SMH, SWC, SWH                                                                                                                                                                                |

Continued on next page

Table 2 – continued from previous page

| Codeword | Triplets                                                                                                                                                                                                                                                                                                                                                                                                                                                                                                                                                                                                                                                                                                                                                                                                                                                                                                                                                                                                                                                                                                                                                                                                                                                                          |
|----------|-----------------------------------------------------------------------------------------------------------------------------------------------------------------------------------------------------------------------------------------------------------------------------------------------------------------------------------------------------------------------------------------------------------------------------------------------------------------------------------------------------------------------------------------------------------------------------------------------------------------------------------------------------------------------------------------------------------------------------------------------------------------------------------------------------------------------------------------------------------------------------------------------------------------------------------------------------------------------------------------------------------------------------------------------------------------------------------------------------------------------------------------------------------------------------------------------------------------------------------------------------------------------------------|
| 9        | DGD, DGH, DGP, DGQ, DID, DIQ, DND, DNP, DNQ, DTD, DTH, DTP, DTQ, DYD, DYH, DYP, DYQ, QGQ, QID, QIQ, QNQ, QTD, QTH, QTP, QTQ, QYD, QYP, QYQ, SGD, SGP, SGQ, SND, SNQ, STD, STQ, SYD, SYQ                                                                                                                                                                                                                                                                                                                                                                                                                                                                                                                                                                                                                                                                                                                                                                                                                                                                                                                                                                                                                                                                                           |
| 10       | GFG, GGG, GIG, GMG, GTG, GYG, IGG, IIG, IIT, ING, ITG, IYG, KFG, KGG, KIG, KIT, KNG, KTG, KYG, NFG, NGG, NIG, NIT, NNG, NTG, NTT, NYG, RFG, RGG, RIG, RIT, RMG, RNG, RTG, RTT, RYG, TFG, TGG, TIG, TIT, TNG, TTG, TTT, TYG, YGG, YIG, YNG, YTG, YYG                                                                                                                                                                                                                                                                                                                                                                                                                                                                                                                                                                                                                                                                                                                                                                                                                                                                                                                                                                                                                               |
| 11       | FDG, FDH, FDI, FDK, FDM, FDN, FDR, FDT, FDW, FDY, FQG, FQK, FQN, FQR, FQT, FQY, FSY, GDF, GDG, GDI, GDK, GDM, GDN, GDR, GDT, GDY, GHM, GQF, GQG, GQI, GQK, GQM, GQN, GQR, GQT, GQW, GQY, IDF, IDG, IDI, IDK, IDM, IDN, IDR, IDT, IDW, IDY, IQE, IQF, IQG, IQI, IQK, IQM, IQN, IQR, IQT, IQW, IQY, ISY, KDE, KDF, KDG, KDI, KDK, KDM, KDN, KDR, KDT, KDW, KDY, KQG, KQK, KQN, KQR, KQT, KQY, KSR, KSY, MDE, MDG, MDI, MDK, MDN, MDR, MDT, MDY, MQG, MQK, MQN, MQR, MQT, MQY, MSR, MSY, NDF, NDG, NDI, NDK, NDM, NDN, NDR, NDT, NDW, NDY, NQE, NQF, NQG, NQI, NQK, NQM, NQN, NQR, NQT, NQW, NQY, NSY, RDE, RDF, RDG, RDI, RDK, RDM, RDN, RDR, RDT, RDW, RDY, RQE, RQF, RQG, RQI, RQK, RQM, RQN, RQR, RQT, RQW, RQY, RSR, RSY, TDF, TDG, TDI, TDK, TDM, TDN, TDR, TDT, TDW, TDY, TQE, TQF, TQG, TQI, TQK, TQM, TQN, TQR, TQT, TQW, TQY, TSY, WDN, WDR, WDT, WDY, WQG, WQR, YDF, YDG, YDI, YDK, YDM, YDN, YDR, YDT, YDW, YDY, YQF, YQG, YQI, YQK, YQM, YQN, YQR, YQT, YQW, YQY, YSY                                                                                                                                                                                                                                                                                                   |
| 12       | AFE, AGE, AIE, AKE, AME, ANE, ARE, ATE, AYE, CFE, CGE, CGK, CGM, CIE, CIK, CKE, CME, CNE, CRE, CTE, CTK, CWE, CYE, CYK, EFE, EGE, EIE, EKE, EME, ENE, ERE, ETE, EWE, EYE, FGE, FNE, FRE, FTE, HCE, HFE, HGE, HGK, HGW, HIE, HKE, HNE, HRE, HTE, HTK, HYE, IGE, LFE, LGE, LIE, LKE, LNE, LRE, LTE, LYE, MGE, MRE, VCE, VFE, VGE, VIE, VKE, VME, VNE, VRE, VTE, VYE, WFE, WGE, WIE, WKE, WME, WNE, WRE, WTE, WVE, WYE                                                                                                                                                                                                                                                                                                                                                                                                                                                                                                                                                                                                                                                                                                                                                                                                                                                               |
| 13       | AKA, AKC, AKH, AKL, AKV, ANC, ANH, ARA, ARC, ARH, ARL, ARV, ATC, CKA, CKC, CKH, CKL, CKV, CRA, CRC, CRH, CRL, CRP, CRV, HKA, HKC, HKH, HKL, HKV, HRA, HRC, HRH, HRL, HRP, HRV, LKA, LKC, LKH, LKL, LKV, LNC, LNH, LRA, LRC, LRH, LRL, LRV, VKA, VKC, VKH, VKL, VKV, VNC, VNH, VRA, VRC, VRH, VRL, VRV, WRH                                                                                                                                                                                                                                                                                                                                                                                                                                                                                                                                                                                                                                                                                                                                                                                                                                                                                                                                                                        |
| 14       | ACE, ACF, ACG, ACI, ACK, ACM, ACN, ACR, ACT, ACW, ACY, AHC, AHE, AHF, AHG, AHI, AHK, AHM, AHN, AHR, AHT, AHW, AHY, AMG, AWC, AWE, AWF, AWG, AWI, AWK, AWM, AWN, AWR, AWT, AWY, CCG, CCI, CCK, CCN, CCR, CCT, CCY, CFK, CFN, CFR, CHG, CHI, CHK, CHN, CHR, CHT, CHY, CMG, CMK, CMN, CMR, CWF, CWG, CWI, CWK, CWM, CWN, CWR, CWT, CWY, ECR, EWF, EWI, EWK, EWN, EWR, EWT, EWY, HCG, HCK, HCN, HCR, HCT, HFR, HHF, HHG, HHI, HHK, HHN, HHR, HHT, HHY, HMG, HMR, HWG, HWK, HWN, HWR, HWT, HWY, LCE, LCF, LCG, LCI, LCK, LCM, LCN, LCR, LCT, LCY, LHC, LHE, LHF, LHG, LHI, LHK, LHM, LHN, LHR, LHT, LHY, LWC, LWE, LWF, LWG, LWI, LWK, LWN, LWR, LWT, LWY, PCR, PHR, PWK, PWN, PWR, PWT, PWY, VCF, VCG, VCI, VCK, VCM, VCN, VCR, VCT, VCY, VHE, VHF, VHG, VHI, VHK, VHM, VHN, VHR, VHT, VHY, VVC, VVE, VWG, VWI, VWK, VWN, VWR, VWT, VWY                                                                                                                                                                                                                                                                                                                                                                                                                                               |
| 15       | DCG, DCI, DCK, DCN, DCR, DCT, DFG, DHG, DHT, DMG, DWG, DWI, DWK, DWN, DWR, DWT, DWY, PCG, PHG, PWG, QCG, QCR, QCT, QFG, QHG, QHT, QMG, QWG, QWK, QWN, QWR, QWT, QWY, SCG, SWG, SWI, SWK, SWN, SWR, SWT, SWY                                                                                                                                                                                                                                                                                                                                                                                                                                                                                                                                                                                                                                                                                                                                                                                                                                                                                                                                                                                                                                                                       |
| 16       | FKG, FKI, FKN, FKR, FKT, FKY, FRG, FRI, FRN, FRR, FRT, FRY, GKG, GRG, IKG, IKN, IKR, IKT, IRG, IRI, IRR, IRT, IRY, KKG, KKI, KKN, KKR, KKT, KRF, KRK, KRI, KRN, KRR, KRT, KRY, MKG, MKK, MKN, MKR, MKT, MKY, MRG, MRN, MRR, MRT, MRY, NKG, NKR, NKT, NRG, NRI, NRR, NRT, NRY, RKG, RKN, RKR, RKT, RRG, RRI, RRN, RRR, RRT, RRY, TKG, TKR, TKT, TRG, TRI, TRR, TRT, TRY, YKG, YKN, YKR, YKT, YKY, YRG, YRN, YRR, YRT, YRY                                                                                                                                                                                                                                                                                                                                                                                                                                                                                                                                                                                                                                                                                                                                                                                                                                                          |
| 17       | FDE, FSE, FSP, FSI, FSK, FSM, FSN, FSR, FST, FSW, GDE, GDW, GSA, GSC, GSE, GSF, GSG, GSH, GSI, GSK, GSM, GSN, GSR, GST, GSV, GSW, GSY, IDE, ISC, ISE, ISF, ISG, ISH, ISI, ISK, ISM, ISN, ISR, IST, ISW, KSC, KSE, KSF, KSG, KSH, KSI, KSK, KSM, KSN, KST, KSW, MSE, MSF, MSG, MSI, MSK, MSM, MSN, MST, MSW, NDE, NSC, NSE, NSF, NSG, NSH, NSI, NSK, NSM, NSN, NSR, NST, NSW, RSA, RSC, RSE, RSF, RSG, RSH, RSI, RSK, RSM, RSN, RST, RSV, RSW, TDE, TSA, TSC, TSE, TSF, TSG, TSH, TSI, TSK, TSM, TSN, TSR, TST, TSV, TSW, YDE, YSA, YSC, YSE, YSF, YSG, YSH, YSI, YSK, YSM, YSN, YSR, YST, YSV, YSW                                                                                                                                                                                                                                                                                                                                                                                                                                                                                                                                                                                                                                                                                |
| 18       | CFH, CMH, CWH, CWQ, ECH, EVH, FAH, FCH, FCL, FCP, FCQ, FFH, FFQ, FHD, FHH, FHP, FHQ, FII, FIQ, FLH, FMH, FMP, FMQ, FPH, FVH, FWH, FWP, FWQ, GAC, GAH, GCC, GCH, GCL, GCP, GCQ, GEH, GFC, GFH, GFP, GFQ, GHC, GHH, GHP, GHQ, GIC, GIH, GIQ, GKH, GLH, GMC, GMD, GMH, GMP, GMQ, GNH, GTH, GVC, GVH, GWC, GWD, GWH, GWP, GWQ, GYH, IAH, ICH, ICL, ICP, ICQ, IFH, IFQ, IHC, IHH, IHP, IHQ, IHI, IIQ, ILH, IMH, IMP, IMQ, IPH, IVC, IVH, IWD, IWH, IWP, IWQ, KAH, KCH, KCQ, KFH, KHH, KHQ, KIH, KKH, KMH, KVH, KWC, KWH, KWQ, MAH, MCH, MCL, MCQ, MFK, MHH, MHP, MHQ, MIH, MLH, MMH, MVH, MWH, MWP, MWQ, NAH, NCC, NCH, NCQ, NFC, NFH, NFQ, NHC, NHH, NHP, NHQ, NIH, NIQ, NKH, NLH, NMC, NMH, NMQ, NVH, NWC, NWD, NWH, NWP, NWQ, RAH, RCH, RCL, RFC, RFH, RHH, RHQ, RIH, RKH, RMC, RMH, RVH, RWC, RWH, RWQ, TAC, TAH, TCC, TCH, TCL, TCP, TCQ, TFC, TFF, TFQ, THH, THP, THQ, TIH, TIQ, TKH, TLH, TMC, TMH, TMP, TMQ, TVC, TVH, TWC, TWD, TWH, TWP, TWQ, WCH, WCQ, WPH, WHQ, WIH, WMH, WWH, WWP, WWQ, YAH, YCC, YCH, YCL, YCP, YCQ, YFH, YHC, YHH, YHP, YIH, YIQ, YMH, YVH, YWC, YWH, YWP, YWQ, YFG, YFR, YFT, YFY, YGG, YGR, YGT, YIG, YIH, YIQ, YIM, YIV, YJC, YJH, YJQ, YJH, YJQ, YJM, YJV, YWC, YWH, YWP, YWQ, YZG, YZH, YZI, YZK, YZM, YZN, YZP, YZQ, YZR, YZS, YZT, YZV, YZW, YZY |
| 19       | SFG, SFR, SFT, SFY, SGG, SGR, SGT, SIG, SII, SIR, SIT, SIY, SMG, SMR, SMT, SMY, SNG, SNR, SNT, STG, STI, STR, STT, SYG, SYR                                                                                                                                                                                                                                                                                                                                                                                                                                                                                                                                                                                                                                                                                                                                                                                                                                                                                                                                                                                                                                                                                                                                                       |
| 20       | AAA, AAL, AAV, ACA, ACC, ACH, ACL, ACV, AGA, AGC, AGL, AGV, AHA, AHL, AHV, ALA, ALL, ALV, ANL, ANV, APA, APC, APE, APH, APL, APV, AVA, AVL, AVV, CCL, CCV, CHA, CHL, CHV, CVL, EPA, EPL, EPV, FCA, FCV, HCA, HCL, HCV, HHA, HHL, HHV, HVA, HVL, ICA, LAA, LAL, LAV, LCA, LCC, LCH, LCL, LCV, LGA, LGC, LGL, LGV, LHA, LHL, LHV, LLA, LLL, LLV, LNL, LNV, LPA, LPC, LPE, LPL, LPV, LVA, LVL, LVV, PPL, VAA, VAL, VAV, VCA, VCC, VCH, VCL, VCV, VGA, VGC, VGL, VGV, VHA, VHL, VHV, VLA, VLL, VLV, VNV, VPA, VPC, VPE, VPL, VPV, VVA, VVL, VVV                                                                                                                                                                                                                                                                                                                                                                                                                                                                                                                                                                                                                                                                                                                                       |
| 21       | DEE, DFE, DFK, DGE, DIE, DIK, DME, DMK, DNE, DNK, DTE, DWE, DYE, PEE, PFE, PGE, PIE, PKE, PME, PNE, PTE, PWE, PYE, QCE, QEE, QFE, QGE, QIE, QME, QNE, QTE, QWE, QYE                                                                                                                                                                                                                                                                                                                                                                                                                                                                                                                                                                                                                                                                                                                                                                                                                                                                                                                                                                                                                                                                                                               |
| 22       | AAC, AAH, AAW, ALC, ALH, ALW, AVC, AVH, AVW, CAA, CAC, CAE, CAF, CAH, CAI, CAK, CAL, CAM, CAN, CAV, CAW, CAY, CCC, CCE, CCF, CCH, CCM, CCW, CEC, CEW, CFC, CFW, CHC, CHE, CHF, CHH, CHM, CHW, CIC, CIH, CIW, CKW, CLA, CLC, CLE, CLF, CLH, CLK, CLL, CLM, CLN, CLV, CLW, CLY, CMW, CPF, CPM, CPW, CQW, CVC, CVE, CVF, CVH, CVK, CVM, CVN, CVV, CVW, CVY, CWC, CWW, EAC, EAH, EAW, ELH, FAC, FAW, FLC, FLW, FVC, FVW, HAA, HAC, HAE, HAF, HAH, HAI, HAK, HAL, HAM, HAN, HAV, HAW, HCC, HCH, HCW, HEC, HEW, HHC, HHE, HHH, HHM, HHW, HII, HKW, HLA, HLC, HLE, HLF, HLH, HLK, HLL, HLM, HLV, HLW, HPW, HVC, HVE, HVF, HVH, HVK, HVM, HVV, HWV, IAC, IAW, ILC, ILW, IVW, LAC, LAE, LAH, LAW, LCW, LHW, LLC, LLE, LLH, LLW, LPW, LVC, LVE, LVH, LVW, MAC, MAW, MLC, MLW, MVC, MVW, NAW, PAH, PEW, VAC, VAE, VAF, VAH, VAM, VAW, VCV, VHC, VHW, VLC, VLE, VLV, VLV, VLV, VLV, VVC, VVE, VVH, VVV, WAC, WAF, WAH, WAI, WAK, WAM, WAN, WAT, WAV, WAW, WAY, WCC, WCF, WCM, WCW, WEC, WEF, WEW, WHC, WHH, WHW, WLA, WLC, WLF, WLH, WLI, WLK, WLM, WLN, WLT, WLW, WLW, WPW, WVC, WVF, WVH, WVI, WVK, WVM, WVN, WVV, WVV                                                                                                                                                                      |
| 23       | AGP, AGS, AIP, AIS, AKS, ANP, ANS, ARS, ATP, ATS, AYP, AYS, LFP, LGP, LGS, LIP, LIS, LKS, LNP, LNS, LRS, LTP, LTS, LYP, LYS, VFP, VGP, VGS, VIP, VIS, VKS, VNP, VNS, VRS, VTP, VTS, VYP, VYS                                                                                                                                                                                                                                                                                                                                                                                                                                                                                                                                                                                                                                                                                                                                                                                                                                                                                                                                                                                                                                                                                      |
| 24       | FGD, FGH, FGQ, FID, FND, FNQ, FRD, FRQ, FTD, FTQ, FYD, FYQ, GGH, IGD, IGH, IGQ, IID, IKQ, IND, INQ, IRD, IRQ, ITD, ITQ, IYD, IYQ, MGD, MGH, MGQ, MID, MIQ, MND, MNQ, MRQ, MTD, MTQ, MYD, MYQ, NGH, NGQ, NNQ, NTQ, NYQ, TGD, TGH, TGO, TNQ, TRQ, TTD, TTH, TTQ, TYD, TYQ, YGD, YGH, YGQ, YND, YNQ, YRQ, YTD, YTH, YTO, YYQ                                                                                                                                                                                                                                                                                                                                                                                                                                                                                                                                                                                                                                                                                                                                                                                                                                                                                                                                                         |
| 25       | DGW, DNW, DTW, SCW, SFC, SFK, SFN, SFW, SGC, SGF, SGH, SGI, SGK, SGM, SGN, SGW, SGY, SIC, SIK, SIN, SIW, SKW, SMK, SMN, SMW, SNC, SNF, SNH, SNI, SNK, SNM, SNN, SNW, SNY, SRW, STC, STF, STH, STK, STM, STN, STW, STY, SWW, SYH, SYN, SYW                                                                                                                                                                                                                                                                                                                                                                                                                                                                                                                                                                                                                                                                                                                                                                                                                                                                                                                                                                                                                                         |

Continued on next page

Table 2 – continued from previous page

| Codeword | Triplets                                                                                                                                                                                                                                                                                                                                                                                                                                                                                                                                                                                                                                                                                                                                                                                                                                                                                                                                                                                                                                                                                                                                                                                                                        |
|----------|---------------------------------------------------------------------------------------------------------------------------------------------------------------------------------------------------------------------------------------------------------------------------------------------------------------------------------------------------------------------------------------------------------------------------------------------------------------------------------------------------------------------------------------------------------------------------------------------------------------------------------------------------------------------------------------------------------------------------------------------------------------------------------------------------------------------------------------------------------------------------------------------------------------------------------------------------------------------------------------------------------------------------------------------------------------------------------------------------------------------------------------------------------------------------------------------------------------------------------|
| 26       | AEE, AEF, AEI, AEK, AEM, AEN, AER, AET, AEW, AEY, CEE, CEF, CEI, CEK, CEM, CEN, CER, CET, CEY, EEE, EEF, EEG, EEI, EEK, EEM, EEN, EER, EET, EEE, HEI, LEE, LEF, LEI, LEK, LEM, LEN, LER, LET, LEW, LEY, VEE, VEF, VEI, VEK, VEM, VEN, VER, VET, VEW, VEY                                                                                                                                                                                                                                                                                                                                                                                                                                                                                                                                                                                                                                                                                                                                                                                                                                                                                                                                                                        |
| 27       | EKA, EKC, EKH, EKL, EKP, EKV, ERA, ERC, ERH, ERL, ERP, ERV, FKA, FKL, FKV, FRA, FRL, FRV, IRA, IRL, IRV, KKA, KKC, KKL, KKV, KRA, KRC, KRH, KRL, KRV, MKA, MKL, MKV, MRA, MRL, MRV, WKL, WKV                                                                                                                                                                                                                                                                                                                                                                                                                                                                                                                                                                                                                                                                                                                                                                                                                                                                                                                                                                                                                                    |
| 28       | AAF, AAG, AAI, AAK, AAM, AAN, AAR, AAT, AAY, ALF, ALG, ALI, ALK, ALM, ALN, ALR, ALT, ALY, AVF, AVG, AVI, AVK, AVM, AVN, AVR, AVT, AVY, CAG, CAR, CAT, CLG, CLR, CLT, CVG, CVR, CVT, EAG, EAR, EVG, HAG, HAR, HAT, HLG, HLR, HVG, HVR, LAF, LAG, LAI, LAK, LAM, LAN, LAR, LAT, LAY, LLF, LLG, LLI, LLK, LLM, LLN, LLR, LLT, LLY, LVF, LVG, LVI, LVK, LVM, LVN, LVR, LVT, LVY, VAG, VAI, VAK, VAN, VAR, VAT, VAY, VLG, VLI, VLK, VLN, VLR, VLT, VLY, VVG, VVI, VVK, VVN, VVR, VVT, VVY, WAG, WLG, WVG                                                                                                                                                                                                                                                                                                                                                                                                                                                                                                                                                                                                                                                                                                                             |
| 29       | EES, FES, FFD, FFS, FIS, FKD, FKS, FMD, FMS, FNS, FRS, FTS, FYS, GFS, GKS, GMS, GWS, IES, IFD, IFS, IIS, IKD, IKS, IMD, IMS, INS, IRS, ITS, IYS, MCS, MES, MFD, MFS, MHS, MIS, MKS, MMS, MNS, MRS, MTS, MWS, MYS, NFS, NIS, NKS, NMS, NNS, NRS, NTS, NWS, NYS, TES, TFD, TFS, THS, TID, TIS, TKD, TKS, TMS, TND, NYS, TRS, TTS, TWS, TYS, YFS, YHS, YIS, YKS, YMS, YNS, YRS, YTS, YWS, YYS                                                                                                                                                                                                                                                                                                                                                                                                                                                                                                                                                                                                                                                                                                                                                                                                                                      |
| 30       | DGF, DGG, DGI, DGK, DGM, DGN, DGR, DGT, DGY, DIG, DIN, DIR, DTG, DTK, DTN, DTR, DTT, DTY, QGF, QGG, QGI, QGK, QGN, QGR, QGT, QGY, QIG, QIR, QTG, QTK, QTN, QTR, QTT, QTY                                                                                                                                                                                                                                                                                                                                                                                                                                                                                                                                                                                                                                                                                                                                                                                                                                                                                                                                                                                                                                                        |
| 31       | CPG, CPI, CPK, CPN, CPR, CPT, CPY, FPC, FPE, FPF, FPG, FPI, FPK, FPM, FPN, FPR, FPT, FPY, GPC, GPF, GPG, GPI, GPK, GPM, GPN, GPR, GPT, GPW, GPY, IPC, IPE, IPF, IPG, IPI, IPK, IPM, IPN, IPR, IPT, IPW, IPY, KPC, KPE, KPF, KPG, KPH, KPI, KPK, KPN, KPR, KPT, KPW, KPY, MPC, MPF, MPG, MPI, MPK, MPN, MPR, MPT, MPY, NPC, NPE, NPF, NPG, NPH, NPI, NPK, NPM, NPN, NPR, NPT, NPW, NPY, RPC, RPE, RPF, RPK, RPH, RPI, RPK, RPM, RPN, RPR, RPT, RPW, RPY, TPC, TPE, TPF, TPI, TPK, TPM, TPN, TPR, TPT, TPW, TPY, WPG, WPI, WPK, WPN, WPR, WPT, WPY, YPC, YPF, YPG, YPH, YPI, YPK, YPM, YPN, YPR, YPT, YPW, YPY                                                                                                                                                                                                                                                                                                                                                                                                                                                                                                                                                                                                                    |
| 32       | ADS, APS, ASD, ASP, ASS, CSS, EDS, ESD, ESS, FSS, HSS, LDS, LPS, LSS, PSS, QSS, VPS, VSS, WSS                                                                                                                                                                                                                                                                                                                                                                                                                                                                                                                                                                                                                                                                                                                                                                                                                                                                                                                                                                                                                                                                                                                                   |
| 33       | DKI, DNF, DNG, DNI, DNN, DNR, DNT, DNY, HKF, HKI, HKM, HKT, HKY, HNG, HNI, HNK, HNN, HNR, HNT, HNY, HYR, PKM, QFR, QKF, QKG, QKI, QKK, QKM, QKN, QKR, QKT, QKY, QNF, QNG, QNI, QNK, QNN, QNR, QNT, QNY, QRI, QRT, QRY                                                                                                                                                                                                                                                                                                                                                                                                                                                                                                                                                                                                                                                                                                                                                                                                                                                                                                                                                                                                           |
| 34       | CGD, CGQ, CGS, CNS, CRS, CTS, CYS, FGS, HGD, HGP, HGQ, HGS, HIS, HTP, HTS, MGS, WCD, WFD, WFP, WFQ, WFS, WGD, WGP, WGQ, WGS, WID, WIP, WIQ, WIS, WKD, WKS, WKQ, WKS, WMD, WMP, WMQ, WMS, WND, WNP, WNQ, WNS, WRD, WRP, WRQ, WRS, WTD, WTP, WTQ, WTS, WWD, WYD, WYP, WYQ, WYS                                                                                                                                                                                                                                                                                                                                                                                                                                                                                                                                                                                                                                                                                                                                                                                                                                                                                                                                                    |
| 35       | DKG, DKN, DKR, DKT, DKY, DRG, DRN, DRR, DRT, DRY, QRG, QRN, QRR, SKF, SKG, SKI, SKK, SKM, SKN, SKR, SKT, SKY, SRF, SRG, SRI, SRK, SRM, SRN, SRR, SRT, SRY                                                                                                                                                                                                                                                                                                                                                                                                                                                                                                                                                                                                                                                                                                                                                                                                                                                                                                                                                                                                                                                                       |
| 36       | CFG, CGG, CGN, CGR, CGT, CGY, CIG, CIN, CIR, CIT, CIY, CNG, CNN, CTG, CTN, CTR, CTT, CTY, CYG, CYN, CYR, CYT, HFG, HGG, HGI, HGN, HGR, HGT, HGY, HIG, HIR, HTG, HTN, HTR, HTT, HTY, HYG, PFG, PFK, PFN, PFR, PFT, PFY, PGF, PGG, PGI, PGK, PGM, PGN, PGR, PGT, PGY, PIG, PIK, PIN, PIR, PIT, PIY, PKF, PKG, PKI, PKK, PKN, PKR, PKT, PKW, PKY, PMG, PMK, PMN, PMR, PMT, PMY, PNF, PNG, PNI, PNK, PNN, PNR, PNT, PNW, PNY, PRF, PRG, PRI, PRK, PRM, PRN, PRR, PRT, PRW, PRY, PTF, PTG, PTI, PTK, PTM, PTN, PTR, PTT, PTW, PTY, PYG, PYK, PYN, PYR, PYT, PYY                                                                                                                                                                                                                                                                                                                                                                                                                                                                                                                                                                                                                                                                      |
| 37       | DDE, DDW, DHE, DHW, DPE, DPF, DPM, DPW, DQE, DQW, DSE, LQE, PDE, PPE, PQE, PSE, QHE, QPE, QPW, QQE, QSE, SDE, SDW, SHE, SHW, SPE, SPH, SPM, SQW, SQE, SQF, SQM, SQW, SSE                                                                                                                                                                                                                                                                                                                                                                                                                                                                                                                                                                                                                                                                                                                                                                                                                                                                                                                                                                                                                                                        |
| 38       | GFD, GGD, GGQ, GID, GKD, GKQ, GND, GNQ, GRD, GRQ, GTD, GTQ, GYD, GYQ, TRD                                                                                                                                                                                                                                                                                                                                                                                                                                                                                                                                                                                                                                                                                                                                                                                                                                                                                                                                                                                                                                                                                                                                                       |
| 39       | AFC, AFF, AFI, AFM, AFW, AGM, AIC, AIF, AII, AIM, AIW, AMC, AMF, AMI, AMM, AMV, ANM, ANW, ATF, ATI, ATM, ATW, AWW, AYF, AYI, AYM, AYW, CFF, CFI, CFM, CIF, CII, CIM, CKM, CMC, CMF, CMI, CMM, CMT, CMY, CNF, CNI, CNM, CTF, CTI, CTM, CYF, CYI, CYM, CYW, CYY, EMM, LFC, LFF, LFI, LFM, LFW, LGF, LGM, LGW, LIC, LIF, LII, LIM, LIW, LKM, LKW, LMC, LME, LMF, LMI, LMM, LMW, LMY, LNF, LNM, LNW, LRM, LTC, LTF, LTI, LTM, LTW, LWM, LWV, LYC, LYF, LYI, LYM, LYW, LYY, VFC, VFF, VFI, VFM, VFW, VGF, VGM, VGW, VIC, VIF, VII, VIM, VIW, VKM, VKW, VMC, VMF, VMI, VMM, VMW, VMY, VNF, VNM, VNW, VRM, VTC, VTF, VTI, VTM, VTW, VWF, VWI, VWW, VYC, VYF, VYI, VYM, VYW, VYY                                                                                                                                                                                                                                                                                                                                                                                                                                                                                                                                                        |
| 40       | ECG, EWG, FCF, FCG, FCI, FCK, FCM, FCN, FCR, FCT, FFG, FFR, FHG, FHI, FHK, FHN, FHR, FHT, FHY, FMG, FMN, FMR, FMT, FWF, FWG, FWI, FWK, FWM, FWN, FWR, FWT, FWY, GCF, GCG, GCI, GCN, GCR, GCT, GHF, GHG, GHI, GHK, GHN, GHR, GHT, GWF, GWG, GWI, GWK, GWN, GWR, GWT, GWY, ICF, ICG, ICI, ICK, ICN, ICR, ICT, IFG, IFN, IFR, IFT, IHF, IHG, IHI, IHK, IHN, IHR, IHT, IMG, IMN, IMR, IMT, IWF, IWG, IWI, IWK, IWM, IWN, IWR, IWT, IWY, KCG, KCR, KHG, KHN, KHR, KHT, KMG, KWF, KWG, KWI, KWK, KWM, KWN, KWR, KWT, KWY, MCA, MCF, MCG, MCI, MCK, MCN, MCT, MFG, MHG, MHK, MHN, MHR, MHT, MHY, MMG, MMR, MMT, MWF, MWG, MWI, MWK, MWM, MWN, MWR, MWT, MWY, NCG, NCI, NCK, NCN, NCR, NCT, NCV, NFN, NHF, NHG, NHI, NHK, NHN, NHR, NHT, NHY, NMG, NWF, NWG, NWI, NWK, NWM, NWN, NWR, NWT, NWY, RCG, RHG, RHR, RWF, RWG, RWI, RWK, RWN, RWR, RWT, RWY, TCF, TCG, TCI, TCK, TCN, TCR, TCT, THF, THG, THI, THK, THN, THR, THT, TMG, TWF, TWG, TWI, TWK, TWM, TWN, TWR, TWT, TWY, WCG, WCI, WCK, WCN, WCR, WCT, WCY, WHG, WHI, WHK, WHN, WHR, WHT, WHY, WWF, WWG, WWI, WWK, WWM, WWN, WWR, WWT, WWY, YCF, YCG, YCI, YCK, YCN, YCR, YCT, YFG, YFR, YHF, YHG, YHI, YHK, YHM, YHN, YHR, YHT, YHY, YMG, YWF, YWG, YWI, YWK, YWN, YWR, YWT, YWY |
| 41       | DDA, DDC, DDD, DDH, DDL, DDP, DDQ, DDS, DDV, DPC, DPH, DPL, DPP, DPV, DQA, DQC, DQH, DQL, DQP, DQQ, DQV, PDC, PDH, PDL, PDP, PDV, PPH, PPP, PQA, PQC, PQH, PQL, PQP, PQV, QDA, QDC, QDH, QDL, QDP, QDQ, QDS, QDV, QHL, QHV, QPC, QPH, QPL, QPV, QQA, QQC, QQH, QQL, QQP, QQQ, QQS, QQV, QSP, SDA, SDC, SDD, SDH, SDL, SDP, SDQ, SDS, SDV, SHP, SPC, SPP, SQA, SQC, SQH, SQL, SQP, SQQ, SQV                                                                                                                                                                                                                                                                                                                                                                                                                                                                                                                                                                                                                                                                                                                                                                                                                                      |
| 42       | DSF, DSG, DSI, DSM, DSN, DST, DSW, DSY, PSF, PSM, PSW, PSY, SDF, SDI, SDM, SDT, SDY, SSF, SSG, SSI, SSM, SSN, SST, SSW, SSY                                                                                                                                                                                                                                                                                                                                                                                                                                                                                                                                                                                                                                                                                                                                                                                                                                                                                                                                                                                                                                                                                                     |
| 43       | KFD, KFQ, KID, KIQ, KKD, KKK, KMD, KMQ, KMS, KND, KNQ, KRQ, KTD, KWD, KYD, KYQ, MKD, MMD, MRD, NFD, NID, NKD, NMD, NND, NRD, NRQ, NTD, NYD, RFD, RFQ, RID, RIQ, RKD, RKQ, RMD, RMP, RMQ, RMS, RND, RNQ, RRD, RRR, RRQ, RTD, RTQ, RWD, RYD, RYQ, TMD, YID, YRD, YYD                                                                                                                                                                                                                                                                                                                                                                                                                                                                                                                                                                                                                                                                                                                                                                                                                                                                                                                                                              |
| 44       | GGF, GGI, GJK, GGM, GGN, GGR, GGT, GGY, GIK, GIN, GIR, GIY, GTK, GTN, GTR, GTY, IGK, IGN, IGR, IGT, IGY, IIN, IIR, ITK, ITN, ITR, ITY, KGK, KGM, KGN, KGR, KGY, KTK, NGK, NGN, NGR, NGT, NGY, NIN, NIR, NIY, NTK, NTN, NTR, NTY, RGF, RGI, RGK, RGM, RGN, RGR, RGT, RGY, RIK, RIN, RIR, RIY, RTK, RTN, RTR, RTY, TGF, TGI, TGM, TGN, TGR, TGT, TGY, TIK, TIN, TIR, TIY, TTK, TTN, TTR, TTY, YGK, YGN, YGR, YGT, YGY, YIR, YTR                                                                                                                                                                                                                                                                                                                                                                                                                                                                                                                                                                                                                                                                                                                                                                                                   |
| 45       | AAS, ALS, AVS, CAD, CAP, CAQ, CAS, CCD, CCP, CCQ, CCS, CES, CFS, CHD, CHP, CHS, CIS, CLD, CLP, CLQ, CLS, CPS, CVD, CVP, CVQ, CVS, ELS, FAS, FLS, FVS, HAD, HAQ, HAS, HCD, HCQ, HCS, HES, HFS, HHS, HLD, HLQ, HLS, HPS, HVD, HVQ, HVS, LAD, LAS, LLS, LVD, LVS, MAS, PAD, PAS, PLS, PVS, QAS, VAD, VAS, VLD, VLS, VVD, VVS, WAD, WAP, WAQ, WAS, WCP, WCS, WES, WHD, WHP, WHS, WLD, WLP, WLQ, WLS, WPS, WVD, WVP, WVQ, WVS                                                                                                                                                                                                                                                                                                                                                                                                                                                                                                                                                                                                                                                                                                                                                                                                        |
| 46       | DFD, DFP, DFS, DIP, DMD, DMP, DMS, DWD, DWP, DWS, PWP, QFD, QMD, QMP, QMS, QWD, QWS, SED, SES, SFD, SPP, SPQ, SFS, SID, SIP, SIQ, SIS, SMD, SMP, SMQ, SMS, SNP, SNS, STP, STS, SWD, SWP, SWQ, SWS, SYP, SYS                                                                                                                                                                                                                                                                                                                                                                                                                                                                                                                                                                                                                                                                                                                                                                                                                                                                                                                                                                                                                     |
| 47       | GED, GEP, GEQ, GES, IED, KED, KEH, KEP, KEQ, KES, NED, NEP, NEQ, NES, NKQ, RED, REH, REP, REQ, RES, TED, TEP, TEQ, TKQ                                                                                                                                                                                                                                                                                                                                                                                                                                                                                                                                                                                                                                                                                                                                                                                                                                                                                                                                                                                                                                                                                                          |

Continued on next page



Table 2 – continued from previous page

| Codeword | Triplets                                                                                                                                                                                                                                                                                                                                                                                                                                                                                                                                                                                                                                                                                                                                                                               |
|----------|----------------------------------------------------------------------------------------------------------------------------------------------------------------------------------------------------------------------------------------------------------------------------------------------------------------------------------------------------------------------------------------------------------------------------------------------------------------------------------------------------------------------------------------------------------------------------------------------------------------------------------------------------------------------------------------------------------------------------------------------------------------------------------------|
| 48       | FFL, FFV, FGL, FGV, FIA, FIL, FIV, FNL, FNV, FTA, FTL, FTV, GFL, GFV, GGA, GGL, GGV, GIA, GIL, GIV, GKL, GNL, GNV, GRA, GRL, GRV, GTA, GTL, GTV, IFL, IGA, IGL, IGV, IIA, IIL, IIV, INL, INV, ITA, ITL, ITV, KAL, KCL, KFC, KFL, KFL, KFA, KGA, KGL, KGV, KIA, KIC, KIL, KIV, KNL, KNV, KTA, KTC, KTL, KTV, MGA, MGL, MGV, MNL, MNV, MTA, MTV, NAL, NCA, NCL, NCV, NFL, NFV, NGA, NGL, NGV, NIA, NIC, NIL, NIV, NKA, NKL, NKV, NNL, NNV, NRA, NRL, NRV, NTA, NTC, NTH, NTL, NTV, NVL, RFL, RFV, RCA, RGL, RGV, RIA, RIC, RIL, RIV, RKA, RKL, RNL, RNV, RRA, RRC, RRL, RRV, RTA, RTG, RTL, RTV, TFL, TGA, TGL, TGV, TIA, TIL, TIV, TNL, TNV, TRA, TRL, TRV, TTA, TTL, TTV, YCV, YFL, YFV, YGA, YGL, YGV, YIA, YIL, YIV, YKL, YNL, YNV, YRA, YRL, YRV, YTA, YTL, YTV                     |
| 49       | AKG, AKK, AKN, AKR, AKW, AKY, ARF, ARG, ARI, ARK, ARM, ARN, ARR, ART, ARW, ARY, CKF, CKG, CKI, CKK, CKN, CKR, CKT, CKY, CRF, CRG, CRI, CRK, CRM, CRN, CRR, CRT, CRY, HKG, HKK, HKN, HKR, HRG, HRI, HRK, HRN, HRR, HRT, HRY, LKG, LKK, LKN, LKR, LKT, LKY, LRF, LRG, LRI, LRK, LRN, LRR, LRT, LRW, LRY, VKG, VKK, VKN, VKR, VKT, VKY, VRF, VRG, VRI, VRK, VRN, VRR, VRT, VRW, VRY                                                                                                                                                                                                                                                                                                                                                                                                       |
| 50       | FFA, FMA, FML, FNA, FWA, FWL, FYA, FYL, FYV, GFA, GKA, GMA, GML, GMV, GNA, GWA, GWL, GYA, GYC, GYL, GYV, IFA, IMA, IML, INA, IWA, IYA, IYL, IYV, KFA, KMA, KMC, KML, KMV, KNA, KWA, KWL, KWV, KYA, KYC, KYH, KYL, KYV, MFA, MMA, MNA, MWA, MWL, MYA, MYL, MYV, NFA, NMA, NML, NMV, NNA, NWA, NWL, NVV, NYA, NYC, NYH, NYL, NYV, RFA, RMA, RML, RMV, RNA, RWA, RWL, RWV, RYA, RYC, RYH, RYL, RVV, TFA, TMA, TML, TNA, TWA, TWL, TYA, TYL, TYV, WMA, WWA, YFA, YKA, YMA, YML, YMV, YNA, YWA, YWL, YWV, YYA, YYH, YYL, YYV                                                                                                                                                                                                                                                                |
| 51       | CDF, CDI, CDK, CDM, CDN, CDR, CDT, CDY, CQF, CQI, CQK, CQM, CQN, CQR, CQT, CQY, DDF, DDG, DDI, DDK, DDM, DDN, DDR, DDT, DDY, DQF, DQI, DQM, DQT, DQY, HDE, HDF, HDG, HDI, HDK, HDM, HDN, HDR, HDT, HDW, HDY, HPF, HPI, HPK, HPM, HPN, HPR, HPT, HQE, HQF, HQG, HQI, HQK, HQM, HQN, HQR, HQT, HQW, HQY, HSF, HSI, HSK, HSM, HSN, HST, HSY, LDE, LDM, LQM, PDF, PDG, PDI, PDK, PDM, PDR, PDT, PDW, PDY, PQG, PQK, PQN, PQR, PQT, PQY, PSI, PSN, PST, QDE, QDF, QDG, QDI, QDK, QDM, QDN, QDR, QDT, QDW, QDY, QPF, QPI, QPT, QQF, QQG, QQI, QQK, QQM, QQN, QQR, QQT, QQW, QQY, QSF, QSG, QSI, QSM, QSN, QST, QSW, QSY                                                                                                                                                                      |
| 52       | KGD, KGH, KGQ, KNH, KTH, KTQ, NGD, RGD, RGH, RGQ, RNH, RTH                                                                                                                                                                                                                                                                                                                                                                                                                                                                                                                                                                                                                                                                                                                             |
| 53       | EAE, EAK, ELE, EVE, FAA, FAE, FAK, FCE, FEE, FHE, FLA, FLE, FLV, FVA, FVE, IAE, ILE, IVE, KAE, KCE, KHE, KLE, KVE, MAA, MAE, MAF, MAK, MCE, MEE, MHE, MLA, MLE, MLK, MLL, MLV, MPE, MVA, MVE, MVK, NAE, NLE, NVE, RAE, RLE, RVE, TAE, WAE, WCE, WEE, WHE, WLE, WVE, YAA, YAC, YAE, YAF, YAI, YAK, YAL, YAM, YAV, YAW, YCA, YCE, YEE, YHE, YLA, YLE, YLH, YLK, YLL, YLV, YLW, YPE, YQE, YVA, YVE, YVK, YVL, YVV, YVW                                                                                                                                                                                                                                                                                                                                                                    |
| 54       | DGS, DIS, DKS, DNS, DRS, DTS, DYS, QFS, QGD, QGP, QGS, QIS, QKS, QNP, QNS, QRS, QTS, QYS, SGS                                                                                                                                                                                                                                                                                                                                                                                                                                                                                                                                                                                                                                                                                          |
| 55       | PCA, PCH, PCL, PCV, PEA, PEL, PEV, PFA, PFC, PFH, PFL, PFP, PFV, PGA, PGC, PGH, PGL, PGP, PGQ, PGV, PGW, PIA, PIC, PIH, PIL, PIP, PIV, PKA, PKC, PKH, PKL, PKV, PMA, PMC, PMH, PML, PMV, PNA, PNC, PNH, PNL, PNP, PNV, PRA, PRC, PRH, PRH, PRV, PTA, PTC, PTH, PTL, PTP, PTV, PWA, PWC, PWH, PWL, PWV, PYA, PYC, PYL, PYZ, PYP, PYV, QGH                                                                                                                                                                                                                                                                                                                                                                                                                                               |
| 56       | FDD, FDP, FDQ, FDS, FPD, FPP, FPQ, FPS, FQD, FQP, FQQ, FQS, FSD, FSQ, GDD, GDP, GDQ, GDS, GPD, GPP, GPQ, GPS, GQD, GQP, GQQ, GQS, GSD, GSP, GSQ, GSS, IDD, IDP, IDQ, IDS, IPD, IPP, IPQ, IPS, IQD, IQP, IQQ, IQS, ISD, ISP, ISQ, ISS, KDD, KDP, KDG, KDS, KPD, KPP, KPQ, KPS, KQD, KQP, KQQ, KQS, KSD, KSP, KSQ, KSS, MDD, MDP, MDQ, MDS, MPD, MPP, MPQ, MPS, MQD, MQP, MQQ, MQS, MSD, MSP, MSQ, MSS, NDD, NDP, NDQ, NDS, NPD, NPP, NPQ, NPS, NQD, NQP, NQQ, NQS, NSD, NSP, NSQ, NSS, RDD, RDP, RDQ, RDS, RPD, RPP, RPQ, RPS, RQD, RQP, RQQ, RQS, RSD, RSP, RSQ, RSS, TDD, TDP, TDQ, TDS, TPD, TPP, TPQ, TPS, TQD, TQP, TQQ, TQS, TSD, TSP, TSQ, TSS, WDD, WDS, WPD, WQS, WSD, YDD, YDP, YDQ, YDS, YPD, YPP, YPQ, YPS, YQD, YQP, YQQ, YQS, YSD, YSP, YSQ, YSS                          |
| 57       | CLI, CVI, HLI, HVI, PAA, PAC, PAE, PAF, PAG, PAI, PAK, PAM, PAN, PAR, PAT, PAV, PAW, PAY, PCC, PCE, PCF, PCI, PCK, PCM, PCN, PCT, PCW, PCY, PHC, PHE, PHF, PHI, PHK, PHM, PHN, PHT, PHV, PHW, PHY, PLA, PLC, PLE, PLF, PLG, PLH, PLI, PLK, PLM, PLN, PLR, PLT, PLV, PLW, PLY, PPC, PPF, PPI, PPM, PPT, PPW, PPY, PQF, PQI, PQM, PQW, PVA, PVC, PVE, PVF, PVG, PVH, PVI, PVK, PVM, PVN, PVR, PVT, PVV, PVW, PVY, VLF, VLM, VVF, VVM                                                                                                                                                                                                                                                                                                                                                     |
| 58       | SFE, SGE, SIE, SKE, SME, SNE, STE, SWE, SYE, SYK                                                                                                                                                                                                                                                                                                                                                                                                                                                                                                                                                                                                                                                                                                                                       |
| 59       | EAD, EAP, EAQ, EAS, ECD, ECP, ECQ, EFD, EFQ, EFS, EGD, EGP, EGQ, EGS, EHD, EHP, EHQ, EID, EIQ, EIS, EKD, EKQ, EKS, EMD, EMQ, EMS, END, ENP, ENQ, ENS, EPD, EPP, EPS, ERD, ERQ, ERS, ETD, ETP, ETQ, ETS, EVD, EVP, EVQ, EVS, EWD, EWQ, EYD, EYQ, EYS                                                                                                                                                                                                                                                                                                                                                                                                                                                                                                                                    |
| 60       | AAP, ALP, AVP, DAC, DAP, DCP, DHP, DLC, DLP, DVC, DVP, HAP, HCP, HFP, HHP, HIP, HLP, HVP, LAP, LLP, LVP, PAP, PAQ, PCP, PEP, PHP, PLP, PVP, QAC, QAP, QAV, QCP, QFP, QHP, QIP, QKP, QLC, QLH, QLP, QLQ, QPP, QVC, QVP, QWP, SAP, SCP, SLP, SVP, VAP, VLP, VVP                                                                                                                                                                                                                                                                                                                                                                                                                                                                                                                          |
| 61       | DAD, DAS, DCD, DCS, DHD, DHS, DLD, DLQ, DLS, DPD, DPQ, DPS, DQD, DQS, DVD, DVS, PLD, PLQ, PPD, PPS, PVD, PVQ, QAD, QCD, QCS, QHD, QHS, QLD, QLS, QPD, QPQ, QPS, QVD, QVS, SAD, SAQ, SAS, SCD, SCQ, SCS, SHD, SHQ, SHS, SLD, SLQ, SLS, SPD, SPQ, SPS, SQD, SQS, SVD, SVQ, SVS                                                                                                                                                                                                                                                                                                                                                                                                                                                                                                           |
| 62       | EQL, FDA, FDL, FHA, FHL, FHV, FLL, FPA, FPL, FQA, FQC, FQH, FQL, FQV, GCA, GCV, GDA, GDC, GDH, GDL, GDV, GHA, GHL, GHV, GLL, GPA, GPH, GPL, GPV, GQA, GQC, GQH, GQL, GQV, GSL, IDA, IDC, IDH, IDL, IDV, IHA, IHL, IHV, ILL, IPA, IPL, IPV, IQA, IQC, IQH, IQL, IQV, KDA, KDC, KDH, KDL, KDV, KHA, KHL, KHV, KPA, KPL, KPV, KQA, KQC, KQH, KQL, KQV, MDA, MDL, MDV, MHA, MHL, MPA, MPL, MPV, MQA, MQC, MQH, MQL, MQV, NDA, NDC, NDH, NDV, NHA, NHL, NHV, NLL, NPA, NPL, NPV, NQA, NQC, NQH, NQL, NQV, RDA, RDC, RDH, RDL, RDV, RHA, RHL, RHV, RPA, RPL, RPV, RQA, RQC, RQH, RQL, RQV, RSL, TCA, TDA, TDC, TDH, TDL, TDV, THA, THL, THV, TLL, TPA, TPL, TPV, TQA, TQC, TQH, TQL, TQV, TSL, WHA, WHL, YDA, YDC, YDH, YDL, YDV, YHA, YHL, YHV, YPA, YPL, YPV, YQA, YQC, YQH, YQL, YQV, YSL |
| 63       | GGG, GIS, GNS, GRS, GTS, GYS, IGS, NGS, TGS, YGS                                                                                                                                                                                                                                                                                                                                                                                                                                                                                                                                                                                                                                                                                                                                       |
| 64       | FED, FEH, FEP, FEQ, FKQ, IEH, IEQ, MED, MEH, MEP, MEQ, MHD, MKQ, MMQ, MWD, NEH, TEH, WED, WEH, WEP, WEQ, YED, YEH, YEP, YEQ, YES, YFD, YFQ, YHD, YHQ, YKD, YKH, YKQ, YMD, YMP, YMQ, YWD                                                                                                                                                                                                                                                                                                                                                                                                                                                                                                                                                                                                |
| 65       | AEV, CEA, CEL, CEV, EEC, EEV, FAL, FAV, FEA, FEC, FEL, FEV, FMV, FVL, FVV, FWV, GEA, GEC, GEL, GEV, GKV, GWV, HEA, HEV, IAL, IAV, ICV, IEA, IEC, IEE, IEL, IEP, IEV, IFV, IKA, IKL, IKV, ILV, IMV, IVL, IVV, IWL, IWV, KEA, KEC, KEL, KEV, MAL, MAV, MCV, MEA, MEC, MEL, MEV, MHV, MMV, MVL, MVV, MWV, NAV, NEA, NEC, NEL, NEV, NVV, REA, REC, REL, REV, RKV, TAL, TAV, TCV, TEA, TEC, TEL, TEV, TIV, TKA, TKL, TKV, TMV, TVL, TVV, TWV, VEV, WEA, WEL, WEV, YEA, YEC, YEL, YEV, YKV                                                                                                                                                                                                                                                                                                   |
| 66       | DAF, DAI, DAM, DAN, DAW, DAY, DCY, DHM, DHY, DLF, DLI, DLM, DLN, DLT, DLW, DLY, DVF, DVI, DVM, DVN, DVT, DVW, DVY, HAY, HCY, HLN, HLT, HLY, HPY, HVN, HVT, HVV, QAF, QAG, QAI, QAK, QAM, QAN, QAR, QAT, QAW, QAY, QCK, QCN, QCY, QHF, QHI, QHM, QHN, QHW, QHY, QLF, QLG, QLI, QLK, QLM, QLN, QLR, QLT, QLW, QLY, QPM, QPY, QVF, QVG, QVI, QVK, QVM, QVN, QVR, QVT, QVW, QVY                                                                                                                                                                                                                                                                                                                                                                                                            |
| 67       | ADE, ADF, ADG, ADI, ADK, ADM, ADN, ADR, ADT, ADW, ADY, APF, APG, API, APK, APN, APR, APT, APY, AQG, AQI, AQK, AQN, AQR, AQT, AQY, ASE, ASF, ASG, ASI, ASK, ASM, ASN, ASR, AST, ASW, ASY, CDG, CQG, CSG, CSN, CSR, CST, CSY, ESG, ESR, FSG, HPG, HSG, HSR, LDF, LDG, LDI, LDK, LDN, LDR, LDT, LDW, LDY, LPF, LPG, LPI, LPK, LPM, LPN, LPR, LPT, LPY, LQF, LQG, LQI, LQK, LQN, LQR, LQT, LQW, LQY, LSF, LSG, LSI, LSK, LSM, LSN, LSR, LST, LSW, LSY, PSG, VDF, VDG, VDI, VDK, VDM, VDN, VDR, VDT, VDW, VDY, VPF, VPG, VPI, VPK, VPN, VPR, VPT, VPY, VQG, VQI, VQK, VQN, VQR, VQT, VQY, VSF, VSG, VSI, VSK, VSM, VSN, VSR, VST, VSW, VSY, WDG, WSG, WSR, WSY                                                                                                                              |

Continued on next page

Table 2 – continued from previous page

| Codeword | Triplets                                                                                                                                                                                                                                                                                                                                                                                                                                                                                                                                                                                                                                                                                                                                                                                                                                                                                                                                                                                                                                                                                                                                                                                                                                                 |
|----------|----------------------------------------------------------------------------------------------------------------------------------------------------------------------------------------------------------------------------------------------------------------------------------------------------------------------------------------------------------------------------------------------------------------------------------------------------------------------------------------------------------------------------------------------------------------------------------------------------------------------------------------------------------------------------------------------------------------------------------------------------------------------------------------------------------------------------------------------------------------------------------------------------------------------------------------------------------------------------------------------------------------------------------------------------------------------------------------------------------------------------------------------------------------------------------------------------------------------------------------------------------|
| 68       | EFF, EFG, EFI, EFK, EFM, EFN, EFR, EFT, EFX, EGF, EGG, EGI, EGK, EGM, EGN, EGR, EGT, EGY, EIF, EIG, EII, EIK, EIM, EIN, EIR, EIT, EIU, EKF, EKG, EKI, EKK, EKM, EKN, EKR, EKT, EKY, EMF, EMG, EMI, EMK, EMN, EMR, EMT, EMY, ENF, ENG, ENI, ENK, ENM, ENN, ENR, ENT, ENY, ERF, ERG, ERI, ERK, ERM, ERN, ERR, ERT, ERY, ETF, ETG, ETI, ETK, ETM, ETN, ETR, ETT, ETY, EYF, EYG, EYI, EYK, EYM, EYN, EYR, EYT, EYY, FFK, FFN, FFT, FFY, FGG, FGI, FGK, FGN, FGR, FGT, FGY, FIG, FIK, FIN, FIR, FIT, FIY, FMY, FNG, FNK, FNN, FNR, FNT, FNY, FTG, FTK, FTN, FTR, FTT, FTY, FYG, FYK, FYN, FYR, FYT, FYY, ITT, KFN, KGF, KGI, KGT, KIN, KIR, KIU, KTN, KTR, KTT, KTY, KYN, KYR, MFK, MFN, MFR, MFT, MFX, MGG, MGI, MGK, MGN, MGR, MGT, MGY, MIG, MIK, MIN, MIR, MIT, MIY, MMK, MMN, MNG, MNK, MNN, MNR, MNT, MNY, MRK, MTG, MTK, MTN, MTR, MTT, MTY, MYG, MYK, MYN, MYR, MYT, MYY, WFG, WFI, WFK, WFN, WFR, WFT, WFX, WGF, WGG, WGI, WGK, WGM, WGN, WGR, WGT, WGY, WIG, WII, WIK, WIN, WIR, WIT, WIY, WKF, WKG, WKI, WKK, WKM, WKN, WKR, WKT, WKY, WMG, WMI, WMK, WMN, WMR, WMT, WMY, WNF, WNG, WNI, WNK, WNM, WNN, WNR, WNT, WNY, WRF, WRG, WRI, WRK, WRM, WRN, WRR, WRT, WRY, WTF, WTG, WTI, WTK, WTN, WTR, WTT, WTY, WYF, WYG, WYI, WYK, WYN, WYR, WYT, WYY |
| 69       | EAY, FAF, FAI, FAM, FAY, FCY, FLF, FLI, FLM, FLN, FLT, FLY, FVF, FVI, FVM, FVN, FVT, FVY, GCY, GHY, GLM, GLY, GUY, IAF, IAI, IAM, IAY, ICM, ICY, IHY, ILF, ILI, ILM, ILN, ILT, ILY, IVF, IVI, IVM, IVN, IVT, IVY, MAM, MAN, MAT, MAY, MCY, MLM, MLN, MLR, MLT, MLY, MVM, MVN, MVR, MVT, MVY, NAY, NLY, NVY, TAF, TAM, TAW, TAY, TCM, TCY, THM, THY, TLF, TLI, TLM, TLW, TLY, TVF, TVM, TVW, TVY, WLY, WYV, YAY, YCY, YLM, YLN, YLT, YLY, YVM, YVY                                                                                                                                                                                                                                                                                                                                                                                                                                                                                                                                                                                                                                                                                                                                                                                                        |
| 70       | EAA, EAL, EAV, ECA, ECL, ECV, EEA, EEL, EFA, EFC, EFH, EFL, EFP, EFV, EGA, EGC, EGH, EGL, EGV, EHL, EIA, EIC, EIH, EIL, EIP, EIV, ELA, ELL, ELV, EMA, EMC, EMH, EML, EMP, EMV, ENA, ENC, ENH, ENL, ENV, ETA, ETC, ETH, ETL, ETV, EVA, EVL, EVV, EWA, EWC, EWH, EWL, EWV, EYA, EYC, EYH, EYL, EYP, EYV, MFL, MFV, MIA, MIL, MIV, MML, MTL                                                                                                                                                                                                                                                                                                                                                                                                                                                                                                                                                                                                                                                                                                                                                                                                                                                                                                                 |
| 71       | AAE, ALE, AVE, GAA, GAE, GAL, GAM, GAV, GAW, GCE, GCM, GEE, GHE, GLA, GLE, GLV, GLW, GPE, GQE, GVA, GVE, GVL, GVV, GVW, IAA, ICE, IHE, ILA, IVA, NAA, NCE, NHE, NLA, NLV, NVA, RCE, RHE, TAA, TCE, THE, TLA, TLE, TLV, TVA, TVE                                                                                                                                                                                                                                                                                                                                                                                                                                                                                                                                                                                                                                                                                                                                                                                                                                                                                                                                                                                                                          |
| 72       | APM, APW, AQE, AQF, AQM, AQW, EAF, EAI, EAM, EAN, EAT, ECC, ECE, ECF, ECI, ECK, ECM, ECN, ECT, ECW, ECU, EDC, EDE, EDF, EDG, EDI, EDK, EDM, EDN, EDR, EDT, EDW, EDY, EHA, EHC, EHE, EHF, EHG, EHH, EHI, EHK, EHM, EHN, EHR, EHT, EHV, EHW, EHY, ELC, ELF, ELG, ELI, ELK, ELM, ELN, ELR, ELT, ELW, ELY, EPC, EPE, EPF, EPG, EPH, EPI, EPK, EPM, EPN, EPR, EPT, EPW, EPY, EQA, EQC, EQE, EQF, EQG, EQH, EQI, EQK, EQM, EQN, EQR, EQT, EQV, EQW, EQY, ESE, ESF, ESI, ESK, ESM, ESN, EST, ESW, ESX, EVC, EVF, EVI, EVK, EVM, EVN, EVR, EVT, EVW, EVY, EWM, FHF, FHM, FQE, FQF, FQI, FQM, FQW, IHM, KHY, KPM, KQE, KQF, KQI, KQM, KQW, MCM, MDF, MDM, MDW, MHF, MHI, MHM, MPM, MQE, MQF, MQI, MQM, MQW, NHM, VPM, VQF, VQM, VQW, WDF, WDI, WDM, WHF, WHM, WPF, WPM, WQF, WQI, WQK, WQM, WQN, WQT, WQW, WQY                                                                                                                                                                                                                                                                                                                                                                                                                                                    |
| 73       | ACD, ACP, ACQ, ACS, AFS, AHD, AHP, AHS, AMS, AWD, AWP, AWQ, AWS, CWD, CWP, CWS, ECS, EHS, EWP, EWS, FCS, FHS, FWD, FWS, HWD, HWP, HWQ, HWS, ICS, IHS, IWS, KHS, KWS, LCD, LCP, LCQ, LCS, LFS, LHD, LHP, LHS, LMS, LWD, LWP, LWQ, LWS, VCD, VCP, VCQ, VCS, VFS, VHS, VMS, VWD, VWP, VWQ, VWS, WWS                                                                                                                                                                                                                                                                                                                                                                                                                                                                                                                                                                                                                                                                                                                                                                                                                                                                                                                                                         |
| 74       | GFF, GFI, GFM, GFN, GFT, GFY, GII, GIT, GKI, GKR, GKT, GKY, GMF, GMI, GMM, GMN, GMT, GMY, GNF, GNG, GNI, GNK, GNM, GNN, GNR, GNT, GNY, GTI, GTT, GWM, GYF, GYI, GYM, GYN, GYR, GYT, GYY, IFY, IKI, IKY, IMY, INI, INK, INN, INR, INT, INY, IYN, IYR, IYT, IYY, KFT, KFY, KKF, KKM, KKY, KMT, KMY, KNF, KNI, KNM, KNN, KNR, KNT, KNY, KYT, KYY, NFT, NFY, NKI, NKY, NMT, NMY, NNI, NNK, NNN, NNR, NNT, NNY, NYN, NYR, NYT, NYX, RFN, RFT, RFX, RFI, RKM, RKY, RNN, RMT, RMY, RNF, RNI, RNK, RNM, RNN, RNR, RNT, RNY, RYI, RYN, RYR, RYT, RYY, TFN, TFT, TFY, TKI, TKY, TMN, TMT, TMY, TNF, TNI, TNK, TNM, TNN, TNR, TNT, TNY, TYN, TYR, TYT, TYY, YNK, YNN, YNR, YNT, YXR                                                                                                                                                                                                                                                                                                                                                                                                                                                                                                                                                                                 |
| 75       | DAE, DCE, DLE, DVE, QAE, QLE, QVE, SAE, SAF, SAM, SAW, SCE, SEE, SLE, SLM, SLW, SVE, SVM, SVW                                                                                                                                                                                                                                                                                                                                                                                                                                                                                                                                                                                                                                                                                                                                                                                                                                                                                                                                                                                                                                                                                                                                                            |
| 76       | DAG, DAK, DAR, DAT, DLG, DLK, DLR, DVG, DVK, DVR, SAG, SAI, SAK, SAN, SAR, SAT, SAY, SCI, SCR, SCT, SLF, SLG, SLI, SLK, SLN, SLR, SLT, SLY, SVF, SVG, SVI, SVK, SVN, SVR, SVT, SVY                                                                                                                                                                                                                                                                                                                                                                                                                                                                                                                                                                                                                                                                                                                                                                                                                                                                                                                                                                                                                                                                       |
| 77       | DEF, DEG, DEI, DEK, DEM, DEN, DER, DET, DEW, DEY, HEG, HEK, HEN, HER, HET, HEY, PEF, PEG, PEI, PEK, PEM, PEN, PER, PET, PEY, QEA, QEF, QEG, QEI, KEK, QEN, QER, QET, QEY, QMR, SEF, SEG, SEI, SEK, SEM, SEN, SER, SET, SEW, SEY                                                                                                                                                                                                                                                                                                                                                                                                                                                                                                                                                                                                                                                                                                                                                                                                                                                                                                                                                                                                                          |
| 78       | DKE, DKF, DKK, DKM, DKW, DRE, DRF, DRH, DRI, DRK, DRM, DRW, PRE, QKE, QKW, QRE, QRF, QRH, QRK, QRM, QRW, SRE                                                                                                                                                                                                                                                                                                                                                                                                                                                                                                                                                                                                                                                                                                                                                                                                                                                                                                                                                                                                                                                                                                                                             |
| 79       | DKD, DKQ, DRD, DRP, DRQ, QKQ, QRD, QRP, QRQ, SKD, SKP, SKQ, SKS, SRD, SRH, SRP, SRQ, SRS                                                                                                                                                                                                                                                                                                                                                                                                                                                                                                                                                                                                                                                                                                                                                                                                                                                                                                                                                                                                                                                                                                                                                                 |
| 80       | CFP, CGP, CIP, CNP, CTP, CYP, FFP, FGP, FIP, FKP, FNP, FRP, FTP, FYP, GGP, GIP, GKP, GNP, GRP, GTP, GYP, IFP, IGP, IIP, IKP, INP, IRP, ITP, IYP, KCP, KFP, KGC, KGP, KHP, KIP, KKP, KMP, KNP, KRP, KTP, KWP, KYP, MCP, MFP, MGP, MIP, MKP, MNP, MRP, MTP, MYP, NCP, NFP, NGC, NGP, NIP, NKP, NMP, NNP, NRP, NTP, NYP, RCP, RFP, RGC, RGP, RIP, RKP, RNP, RRP, RTP, RWP, RYP, TFP, TGP, TIP, TKP, TNP, TRP, TTP, TYP, YFP, YGP, YIP, YKP, YNP, YRP, YTP, YYP                                                                                                                                                                                                                                                                                                                                                                                                                                                                                                                                                                                                                                                                                                                                                                                              |
| 81       | AAA, KAC, KAF, KAG, KAI, KAK, KAM, KAN, KAR, KAT, KAV, KAW, KAY, KCA, KCC, KCF, KCI, KCK, KCM, KCN, KCT, KCV, KCW, KCY, KHC, KHG, KHI, KHK, KHM, KHW, KLA, KLC, KLF, KLG, KLH, KLI, KLK, KLL, KLM, KLN, KLR, KLT, KLV, KLW, KLY, KVA, KVC, KVF, KVG, KVI, KVK, KVL, KVM, KVN, KVR, KVT, KVV, KVW, KVY, MAI, MLF, MLI, MVF, MVI, NAC, NAF, NAI, NAM, NCF, NCM, NLC, NLF, NLI, NLM, NLW, NVC, NVF, NVI, NVM, NVW, RAA, RAC, RAF, RAG, RAI, RAK, RAM, RAN, RAR, RAT, RAV, RAW, RAY, RCA, RCC, RCF, RCI, RCK, RCM, RCN, RCR, RCT, RCY, RCW, RCH, RHC, RHF, RHI, RHK, RHM, RHN, RHT, RHW, RHY, RLA, RLC, RLF, RLG, RLH, RLI, RLK, RLL, RLM, RLN, RLR, RLT, RLV, RLW, RLY, RVA, RVC, RVF, RVG, RVI, RVK, RVM, RVN, RVR, RVT, RVV, RVW, RVY, RWM, TLC, TVI, YLC, YLF, YLI, YVC, YVF, YVI                                                                                                                                                                                                                                                                                                                                                                                                                                                                        |
| 82       | FKK, FRK, GKE, GKF, GKK, GKM, GKN, GRC, GRE, GRF, GRH, GRI, GRK, GRM, GRN, GRR, GRT, GRW, GRY, IKK, IRK, IRN, KKK, KRK, KRM, NKF, NKK, NKM, NKN, NRP, NRK, NRM, NRN, RKK, RRF, RRR, RRM, TKF, TKK, TKM, TKN, TRF, TRK, TRM, TRN, YKK, YRK                                                                                                                                                                                                                                                                                                                                                                                                                                                                                                                                                                                                                                                                                                                                                                                                                                                                                                                                                                                                                |
| 83       | AAD, AAQ, AEC, AED, AEH, AEL, AEP, AEQ, AES, AFH, AFP, AFQ, AHH, AIH, AMH, AMP, AMQ, AVD, AVQ, AWH, CED, CEH, CEP, CEQ, EED, EEH, EEP, EEQ, HED, HEH, HEL, HEP, HEQ, LAQ, LEC, LED, LEH, LEL, LEP, LEQ, LES, LEV, LFH, LFQ, LHH, LHM, LMP, LMQ, LVQ, LWH, VAQ, VEC, VED, VEH, VEL, VEP, VEQ, VES, VFH, VFQ, VMH, VMP, VMQ, VVQ, VWH                                                                                                                                                                                                                                                                                                                                                                                                                                                                                                                                                                                                                                                                                                                                                                                                                                                                                                                      |
| 84       | DHF, DHI, DHK, DHN, DHR, DPG, DPI, DPK, DPN, DPR, DPT, DPY, DQG, DQK, DQN, DQR, PPG, PPK, PPN, PPR, QHK, QHR, QPG, QPK, QPN, QPR, SCF, SCK, SCM, SCN, SCY, SDG, SDN, SHF, SHG, SHI, SHK, SHM, SHN, SHR, SHT, SHY, SPP, SPG, SPI, SPK, SPN, SPR, SPT, SPY, SQG, SQI, SQK, SQN, SQR, SQT, SQY                                                                                                                                                                                                                                                                                                                                                                                                                                                                                                                                                                                                                                                                                                                                                                                                                                                                                                                                                              |
| 85       | FFF, FFI, FFM, FGM, FIF, FII, FIM, FMF, FMI, FMM, FNI, FRM, FTF, FTI, FTM, FYF, FYI, FYM, GIF, GIM, GTF, GTM, IFF, IFI, IFM, IGI, IIF, IIM, IY, IMF, IMI, IMM, ITF, ITI, ITM, IYI, IYM, KFF, KFI, KFM, KIF, KII, KIM, KMF, KMI, KMM, KTF, KTI, KTM, KYF, KYI, KYM, MEF, MEM, MFF, MFI, MFM, MGF, MGM, MIF, MII, MIM, MKF, MKI, MKM, MMF, MMI, MMM, MMY, MNF, MNI, MNM, MRF, MRI, MRM, MTF, MTI, MTM, MYF, MYI, MYM, NFF, NFI, NFM, NGF, NGI, NGM, NIF, NII, NIM, NMF, NMI, NMM, NNF, NNM, NTF, NTI, NTM, NYF, NYI, NYM, RFF, RFI, RFM, RIF, RII, RIM, RIW, RMF, RMI, RMM, RPF, RTI, RTM, RYF, RYM, TFF, TFI, TFM, TIF, TII, TIM, TMF, TMI, TMM, TTF, TTI, TTM, TYF, TYI, TYM, WFF, WFM, WIF, WIM, WMF, WMM, WTM, WYM, YCM, YEF, YEM, YEW, YFC, YFF, YFI, YFK, YFM, YFN, YFT, YFW, YFY, YGF, YGI, YGM, YIC, YIF, YII, YIK, YIM, YIN, YIT, YIW, YIY, YKF, YKI, YKM, YMC, YMF, YMI, YMK, YMM, YMN, YMT, YMW, YMY, YNF, YNI, YNM, YNY, YRF, YRI, YRM, YTC, YTF, YTI, YTK, YTM, YTN, YTT, YTW, YTY, YWM, YXC, YYF, YYI, YYM, YYN, YYT, YYW, YYY                                                                                                                                                                                                               |

Continued on next page

Table 2 – continued from previous page

| Codeword | Triplets                                                                                                                                                                                                                                                                                                                                                                                                                                                                                                                                                                                                                                                                                                                                                                                                                                                                                                                                                                                                                                                                                                                                                                                                    |
|----------|-------------------------------------------------------------------------------------------------------------------------------------------------------------------------------------------------------------------------------------------------------------------------------------------------------------------------------------------------------------------------------------------------------------------------------------------------------------------------------------------------------------------------------------------------------------------------------------------------------------------------------------------------------------------------------------------------------------------------------------------------------------------------------------------------------------------------------------------------------------------------------------------------------------------------------------------------------------------------------------------------------------------------------------------------------------------------------------------------------------------------------------------------------------------------------------------------------------|
| 86       | DFA, DFL, DFV, DGA, DGC, DGL, DGV, DIA, DIL, DIV, DKA, DKL, DKV, DMA, DML, DMV, DNA, DNC, DNL, DNV, DRA, DRC, DRL, DRV, DTA, DTC, DTL, DTV, DWA, DWV, DYA, DYV, DYV, QFL, QGA, QGC, QGL, QGV, QIA, QIL, QIV, QKA, QKL, QKV, QML, QNA, QNL, QNV, QRA, QRC, QRL, QRV, QTA, QTC, QTL, QTV, QWL, QYA, QYL, QYV, SFA, SFL, SFV, SGA, SGL, SGV, SIA, SIL, SIV, SKA, SKC, SKL, SKV, SMA, SMC, SML, SMV, SNA, SNL, SNV, SRA, SRC, SRL, SRV, STA, STL, STV, SWA, SWL, SWV, SYA, SYC, SYL, SYV                                                                                                                                                                                                                                                                                                                                                                                                                                                                                                                                                                                                                                                                                                                        |
| 87       | ELD, ELP, ELQ, FAD, FAP, FAQ, FCD, FLD, FLP, FLQ, FVD, FVP, FVQ, GAD, GAP, GAQ, GAS, GCD, GCS, GHD, GHS, GLD, GLP, GLQ, GLS, GVD, GVP, GVQ, GVS, IAD, IAP, IAQ, IAS, ICD, IHD, ILD, ILP, ILQ, ILS, IVD, IVP, IVQ, IVS, KAD, KAP, KAQ, KAS, KCD, KHD, KLD, KLP, KLQ, KLS, KVD, KVP, KVQ, KVS, MAD, MAP, MAQ, MCD, MLD, MLP, MLQ, MLS, MVD, MVP, MVQ, MVS, NAD, NAP, NAQ, NAS, NCD, NCS, NHD, NHS, NLD, NLP, NLQ, NLS, NVD, NVP, NVQ, NVS, RAD, RAL, RAP, RAQ, RAS, RCD, RCQ, RHD, RHP, RHS, RLD, RLP, RLQ, RLS, RVD, RVL, RVP, RVQ, RVS, TAD, TAP, TAQ, TAS, TCD, TCS, THD, TLD, TLP, TLQ, TLS, TVD, TVP, TVQ, TVS, YAD, YAP, YAQ, YAS, YCD, YCS, YLD, YLP, YLQ, YLS, YVD, YVP, YVQ, YVS                                                                                                                                                                                                                                                                                                                                                                                                                                                                                                                     |
| 88       | AFD, AGD, AGH, AGQ, AID, AIQ, AKD, AKP, AKQ, AMD, AND, ANQ, ARD, ARP, ARQ, ATD, ATH, ATQ, AYD, AYQ, CRQ, CTQ, LFD, LGD, LGH, LGQ, LID, LIQ, LKD, LKP, LKQ, LMD, LND, LNQ, LRD, LRP, LRQ, LTD, LTH, LTQ, LYD, LYQ, VFD, VGD, VGH, VGQ, VID, VIQ, VKD, VKP, VKQ, VMD, VND, VNQ, VRD, VRP, VRQ, VTD, VTH, VTQ, VYD, VYQ                                                                                                                                                                                                                                                                                                                                                                                                                                                                                                                                                                                                                                                                                                                                                                                                                                                                                        |
| 89       | DSA, DSC, DSD, DSH, DSL, DSP, DSQ, DSS, DSV, PSP, QSC, QSH, QSL, QSQ, QSV, SSA, SSC, SSD, SSH, SSL, SSP, SSQ, SSS, SSV                                                                                                                                                                                                                                                                                                                                                                                                                                                                                                                                                                                                                                                                                                                                                                                                                                                                                                                                                                                                                                                                                      |
| 90       | FFE, FIE, FKE, FME, FMK, FWE, FYE, GFE, GFK, GGE, GIE, GME, GNE, GTE, GWE, GYE, GYK, IFE, IFK, IIE, IIK, IKE, IME, IMK, INE, IRE, ITE, IWE, IYE, IYK, KEE, KFE, KFK, KGE, KIE, KIK, KKE, KME, KMK, KNE, KNK, KRE, KTE, KWE, KYE, KYK, MFE, MIE, MKE, MME, MNE, MTE, MWE, MYE, NEE, NFE, NFK, NGE, NIE, NIK, NKE, NME, NNE, NRE, NTE, NWE, NYE, NYK, REE, RFE, RFK, RGE, RIE, RKE, RME, RMK, RNE, RRE, RTE, RWE, RYE, RYK, TEE, TFE, TFK, TGE, TIE, TKE, TME, TMK, TNE, TTE, TWE, TYE, TYK, YFE, YGE, YIE, YKE, YME, YNE, YRE, YTE, YWE, YYE, YYK                                                                                                                                                                                                                                                                                                                                                                                                                                                                                                                                                                                                                                                            |
| 91       | ADA, ADL, ADV, AQA, AQV, ASA, ASC, ASL, ASV, CDA, CDC, CDE, CDH, CDL, CDV, CDW, CPA, CPC, CPE, CPH, CPL, CPV, CQA, CQC, CQE, CQH, CQL, CQV, CSA, CSC, CSE, CSF, CSH, CSI, CSK, CSL, CSM, CSP, CSV, CSW, EDA, EDL, EDV, ESA, ESC, ESL, ESP, ESV, FDC, FDH, FDV, FPV, FSA, FSC, FSH, FSL, FSP, FSV, HDA, HDC, HDH, HDL, HDV, HPA, HPC, HPE, HPH, HPL, HPV, HQA, HQC, HQL, HQV, HSA, HSC, HSE, HSH, HSL, HSP, HSV, HSW, ISA, ISL, ISV, KSA, KSL, KSV, LDA, LDL, LDV, LQA, LQV, LSA, LSC, LSE, LSL, LSV, MDC, MDH, MSA, MSC, MSH, MSL, MSV, NSA, NSL, NSV, PDA, PPA, PPV, PSA, PSC, PSH, PSL, PSV, QSA, VDA, VDC, VDE, VDL, VDV, VQA, VQE, VQL, VQV, VSA, VSC, VSE, VSL, VSV, WDA, WDC, WDE, WDH, WDK, WDL, WDP, WDV, WDW, WHV, WLL, WPA, WPC, WPE, WPH, WPL, WPP, WPV, WQA, WQC, WQE, WQH, WQL, WQP, WQV, WSA, WSC, WSE, WSF, WSH, WSI, WSK, WSL, WSM, WSN, WSP, WSQ, WST, WSV, WSW                                                                                                                                                                                                                                                                                                                            |
| 92       | DNM, DTF, DTM, DYC, DYF, DYM, DYW, HGF, HGM, HNF, HNM, HNW, HRF, HRM, HRW, HTF, HTI, HTM, HTW, HYC, HYF, HYH, HYI, HYK, HYM, HYN, HYT, HYW, HYY, PFI, PYI, PYM, PYW, QGM, QGW, QNC, QNM, QNW, QTF, QTI, QTM, QTW, QYC, QYF, QYH, QYI, QYM, QYW, QYY, SYF, SYM                                                                                                                                                                                                                                                                                                                                                                                                                                                                                                                                                                                                                                                                                                                                                                                                                                                                                                                                               |
| 93       | CFD, CFQ, CID, CIQ, CKD, CKP, CKQ, CKS, CMD, CMP, CMQ, CMS, CND, CNQ, CRD, CTD, CYD, CYQ, HFD, HFQ, HID, HIQ, HKD, HKP, HKQ, HKS, HMD, HMP, HQD, HMS, HND, HNP, HNQ, HNS, HRD, HRQ, HRS, HTD, HTQ, HYD, HYP, HYQ, HYS, PCD, PCQ, PCS, PED, PEQ, PES, PFD, PFQ, PFS, PGD, PGS, PHD, PHQ, PHS, PID, PIQ, PIS, PKD, PKP, PKQ, PKS, PMD, PMP, PMQ, PMS, PND, PNQ, PNS, PRD, PRP, PRQ, PRS, PTD, PTQ, PTS, PWD, PWQ, PWS, PYD, PYQ, PYS, QKD, QND                                                                                                                                                                                                                                                                                                                                                                                                                                                                                                                                                                                                                                                                                                                                                                |
| 94       | AEA, AFA, AFL, AFV, AIA, AIL, AIV, AMA, AML, AMV, ANA, ATA, ATL, ATV, AWA, AWL, AWV, AYA, AYC, AYH, AYL, AYV, HMA, HML, HYA, LEA, LFA, LFL, LFL, LFL, LIA, LIL, LIV, LMA, LML, LMV, LNA, LTA, LTL, LTV, LWA, LWL, LWV, LYA, LYH, LYL, LYV, VEA, VFA, VFL, VFW, VIA, VIH, VIL, VIV, VMA, VML, VMV, VNA, VNL, VTA, VTL, VTV, VVA, VWL, VVW, VYA, VYH, VYL, VYV                                                                                                                                                                                                                                                                                                                                                                                                                                                                                                                                                                                                                                                                                                                                                                                                                                                |
| 95       | CCA, CFA, CFL, CFV, CGA, CGC, CGF, CGH, CGI, CGL, CGV, CIA, CIL, CIV, CMA, CML, CMV, CNA, CNC, CNH, CNL, CNV, CTA, CTC, CTH, CTL, CTV, CVA, CWA, CWL, CWV, CYA, CYC, CYH, CYL, CYV, FGA, HFA, HFL, HFV, HGA, HGC, HGH, HGL, HGV, HIA, HIL, HIV, HNA, HNC, HNH, HNL, HNV, HTA, HTC, HTH, HTL, HTV, HWA, HWL, HYL, HYY, WAA, WAL, WCA, WCL, WCV, WFA, WFL, WFL, WFL, WGA, WGC, WGH, WGL, WGV, WIA, WIC, WIL, WIV, WKA, WML, WMV, WNA, WNL, WNV, WRA, WRL, WRV, WTA, WTC, WTH, WTL, WTV, WVA, WVW, WWL, WWV, WYA, WYL, WYV                                                                                                                                                                                                                                                                                                                                                                                                                                                                                                                                                                                                                                                                                     |
| 96       | KCS, KFS, KGS, KIS, KKS, KNS, KRS, KTS, KYS, RCS, RFS, RGS, RIS, RKS, RNS, RRS, RTS, RWS, RYS                                                                                                                                                                                                                                                                                                                                                                                                                                                                                                                                                                                                                                                                                                                                                                                                                                                                                                                                                                                                                                                                                                               |
| 97       | FAG, FAN, FAR, FAT, FLG, FLK, FLR, FVG, FVK, FVR, GAF, GAG, GAI, GAK, GAN, GAR, GAT, GAY, GCK, GLC, GLF, GLG, GLI, GLK, GLN, GLR, GLT, GVF, GVG, GVI, GVK, GVM, GVN, GVR, GVT, IAG, IAK, IAN, IAR, IAT, ILG, ILK, ILR, IVG, IVK, IVR, MAG, MAR, MLG, MVG, NAG, NAK, NAN, NAR, NAT, NLG, NLK, NLN, NLR, NLT, NVG, NVK, NVN, NVR, NVT, TAG, TAI, TAK, TAN, TAR, TAT, TLG, TLK, TLN, TLR, TLT, TVG, TVK, TVN, TVR, TVT, WAR, WLR, WVR, WVT, YAG, YAN, YAR, YAT, YLG, YLR, YVG, YVN, YVR, YVT                                                                                                                                                                                                                                                                                                                                                                                                                                                                                                                                                                                                                                                                                                                   |
| 98       | AGW, CGW, CNW, CRW, CTW, EEW, EFW, EGW, EIW, EKW, EMW, ENW, ERW, ETW, EWW, EYW, FCC, FCW, FEW, FFC, FFW, FGC, FGF, FGW, FHC, FHW, FIC, FIW, FKC, FKF, FKH, FKM, FKW, FMC, FMW, FNC, FNF, FNH, FNM, FNV, FPW, FRC, FRF, FRH, FRW, FTC, FTH, FTW, FWC, FWW, FYC, FYH, FYW, GCW, GFW, GGC, GGW, GHW, GIW, GKC, GKW, GMW, GNC, GNW, GTC, GTW, GWW, GYW, ICC, ICW, IEW, IFC, IFW, IGC, IGF, IGM, IGW, IHW, IIC, IIV, IKC, IKF, IKH, IKM, IKW, IMC, IMW, INC, INH, INM, INW, IRC, IRF, IRH, IRM, IRW, ITC, ITH, ITW, IWC, IWW, IYC, IYF, IYH, IYW, KFW, KGW, KIW, KKW, KMW, KNC, KNW, KRW, KTW, KWW, KYW, MCC, MCW, MEW, MFC, MFW, MGC, MGW, MHC, MHW, MIC, MIW, MKC, MKH, MKW, MMC, MMW, MNC, MNH, MNW, MPH, MPW, MRC, MRH, MRW, MTC, MTH, MTW, MWC, MWW, MYC, MYH, MYW, NCW, NEW, NFW, NGW, NHW, NIW, NKC, NKW, NMW, NNC, NNH, NNW, NRC, NRH, NRW, NTW, NWW, NYW, RFW, RGW, RKC, RKW, RMW, RNC, RNW, RRW, RTW, RWW, RYW, TCW, TEW, TFW, TGC, TGW, THW, TIC, TIW, TKC, TKW, TMW, TNC, TNH, TNW, TRC, TRH, TRW, TTC, TFW, TWW, TYC, TYH, TYW, WFC, WFW, WGW, WIW, WKW, WKH, WKW, WMC, WMW, WNC, WNH, WNW, WRC, WRW, WTW, WWC, WWW, WYC, WYH, WYW, YCW, YGC, YGW, YHW, YKC, YKW, YNC, YNH, YNW, YRC, YRH, YRW, YYW |
| 99       | ADC, ADD, ADH, ADP, ADQ, AHQ, ALD, ALQ, APD, APP, APQ, AQC, AQD, AQH, AQL, AQP, AQQ, AQS, ASH, ASQ, CDD, CDP, CDQ, CDS, CHQ, CPD, CPP, CPQ, CQD, CQP, CQQ, CQS, CSD, CSQ, EDD, EDH, EDP, EDQ, EPQ, EQD, EQP, EQQ, EQS, ESQ, HDD, HDP, HDQ, HDS, HDD, HHQ, HPD, HPP, HPQ, HQD, HQH, HQP, HQQ, HQS, HSD, HSQ, LDC, LDD, LDH, LDP, LDQ, LHQ, LLD, LLQ, LPD, LPH, LPP, LPQ, LQC, LQD, LQH, LQL, LQP, LQQ, LQS, LSD, LSH, LSP, LSQ, PDD, PDQ, PDS, PPQ, PQD, PQQ, PQS, PSD, PQD, QDD, QQD, QSD, VDD, VDH, VDP, VDQ, VDS, VHD, VHH, VHP, VHQ, VLQ, VPD, VPH, VPP, VPQ, VQC, VQD, VQH, VQP, VQQ, VQS, VSD, VSH, VSP, VSQ, WQD, WPQ, WQD, WQQ                                                                                                                                                                                                                                                                                                                                                                                                                                                                                                                                                                       |
| 100      | DCF, DCM, DCW, DFC, DFF, DFI, DFM, DFN, DFW, DFY, DIC, DIF, DIH, DIM, DIW, DIY, DMC, DMF, DMI, DMM, DMW, DMY, DWF, DWM, DWW, HCF, HCI, HCM, HEF, HEM, HFC, HFF, HPH, HPI, HFK, HFM, HFN, HFT, HFW, HFY, HIC, HIF, HII, HIK, HIM, HIN, HIT, HIW, HIY, HMC, HME, HMF, HMH, HMI, HMK, HMM, HMN, HMT, HMV, HMW, HMY, HWC, HWE, HWF, HWI, HWM, HWV, HWW, PFF, PFI, PFM, PFW, PIF, PII, PIM, PIW, PMF, PMI, PMM, PMW, PWF, PWI, PWM, PWW, QCC, QCF, QCI, QCM, QCW, QEM, QEW, QFA, QFC, QFF, QFI, QFK, QFM, QFN, QFT, QFV, QFW, QFY, QIC, QIF, QIH, QIK, QIM, QIN, QIT, QIW, QIY, QMA, QMC, QMF, QMI, QMK, QMM, QMN, QMT, QMV, QMW, QMY, QWA, QWC, QWF, QWI, QWM, QWV, QWW, SFF, SFI, SFM, SIF, SIM, SMF, SMI, SMM, SWF, SWM                                                                                                                                                                                                                                                                                                                                                                                                                                                                                       |

|     | Seqs <sup>1</sup> | TcR Seqs <sup>2</sup> | Functional <sup>3</sup> | Distinct nt <sup>4</sup> | Distinct CDR3 <sup>5</sup> |
|-----|-------------------|-----------------------|-------------------------|--------------------------|----------------------------|
| U   | 1,788,551         | 428,326               | 404,032                 | 186,599                  | 113,429                    |
| U   | 3,430,471         | 873,607               | 831,605                 | 303,266                  | 171,004                    |
| U   | 1,023,799         | 172,105               | 164,114                 | 97,601                   | 69,125                     |
| U   | 2,394,189         | 175,924               | 166,398                 | 74,141                   | 48,244                     |
| U   | 2,949,666         | 347,621               | 326,310                 | 106,112                  | 65,806                     |
| U   | 3,840,471         | 216,790               | 207,135                 | 38,902                   | 27,660                     |
| D5  | 10,005,718        | 2,034,715             | 1,931,868               | 720,436                  | 415,436                    |
| D5  | 2,770,773         | 930,044               | 884,619                 | 408,830                  | 256,116                    |
| D5  | 4,479,250         | 1,589,692             | 1,512,244               | 432,490                  | 267,451                    |
| D5  | 2,480,475         | 834,436               | 795,269                 | 205,329                  | 138,134                    |
| D5  | 10,413,014        | 2,730,565             | 2,576,696               | 1,008,680                | 558,64                     |
| D5  | 10,578,666        | 2,050,542             | 1,946,156               | 531,214                  | 317,637                    |
| D14 | 5,689,589         | 1,884,138             | 1,792,945               | 570,080                  | 346,164                    |
| D14 | 4,297,876         | 1,320,231             | 1,254,062               | 517,549                  | 323,291                    |
| D14 | 6,415,997         | 1,260,362             | 1,205,562               | 371,107                  | 236,863                    |
| D14 | 4,251,640         | 1,258,960             | 1,203,263               | 372,241                  | 236,572                    |
| D14 | 4,220,098         | 842,190               | 799,261                 | 318,764                  | 206,532                    |
| D14 | 5,829,487         | 1,182,640             | 1,131,125               | 413,942                  | 260,594                    |
| M2  | 4,497,142         | 424,287               | 406,912                 | 154,001                  | 107,337                    |
| M2  | 6,570,454         | 441,799               | 422,609                 | 111,140                  | 82,213                     |
| M2  | 6,754,251         | 764,024               | 732,688                 | 153,383                  | 110,533                    |
| M2  | 5,303,993         | 357,340               | 341,430                 | 110,816                  | 83,392                     |
| M2  | 3,601,458         | 339,273               | 321,471                 | 203,614                  | 139,381                    |
| M2  | 7,124,801         | 410,596               | 387,232                 | 177,126                  | 121,348                    |

Table 1: Summary of murine HTS TcR data used in this study. The analysis described in this study focused exclusively on functional TcRs. (1) The number of sequences generated which pass the sequence quality threshold. (2) The number of sequences recognized and classified by Decombinator as TcRs. (3) The number of sequences containing an in frame CDR3.(4) The number of TcRs obtained counting each distinct sequence once only. (5) The number of CDR3 sequences obtained, counting each CDR3 sequence once only.
